# Supplementary material for: Evolution of DNA replication origin specification and gene silencing mechanisms
Source: PubMed Central journal article supplement (PMC7560902; doi:10.1038/s41467-020-18964-x), 2020-10-14
Supplement: 41467_2020_18964_MOESM1_ESM.pdf [file 41467_2020_18964_MOESM1_ESM.pdf]

# **Evolution of DNA Replication Origin Specification and Gene Silencing Mechanisms**

Hu et al.

## **Supplementary Information**

Supplementary Figures 1-13

Supplementary Tables 1-3

Supplementary Methods Tables 1-2



the opposite strand. Bases numbering denote as the positions in logo (see Fig. 2b). **c** shows Orc2 loop origin DNA minor groove insertion with base-specific interaction between W396 and G25, C25' and T26, and base-nonspecific interaction between Y395 and phosphate backbone of T27. **d-e**, same as in **c**, but view in different angles. **d** shows the base-specific interaction between W396 and G25, C25' and T26. **e** shows the base-nonspecific interaction between R390 and phosphate backbone of T23' and base-nonspecific interaction between H399 and phosphate backbone of A24'.

*orc4Δ::TRP1* + pORC4/*URA3* + plasmid indicated below:

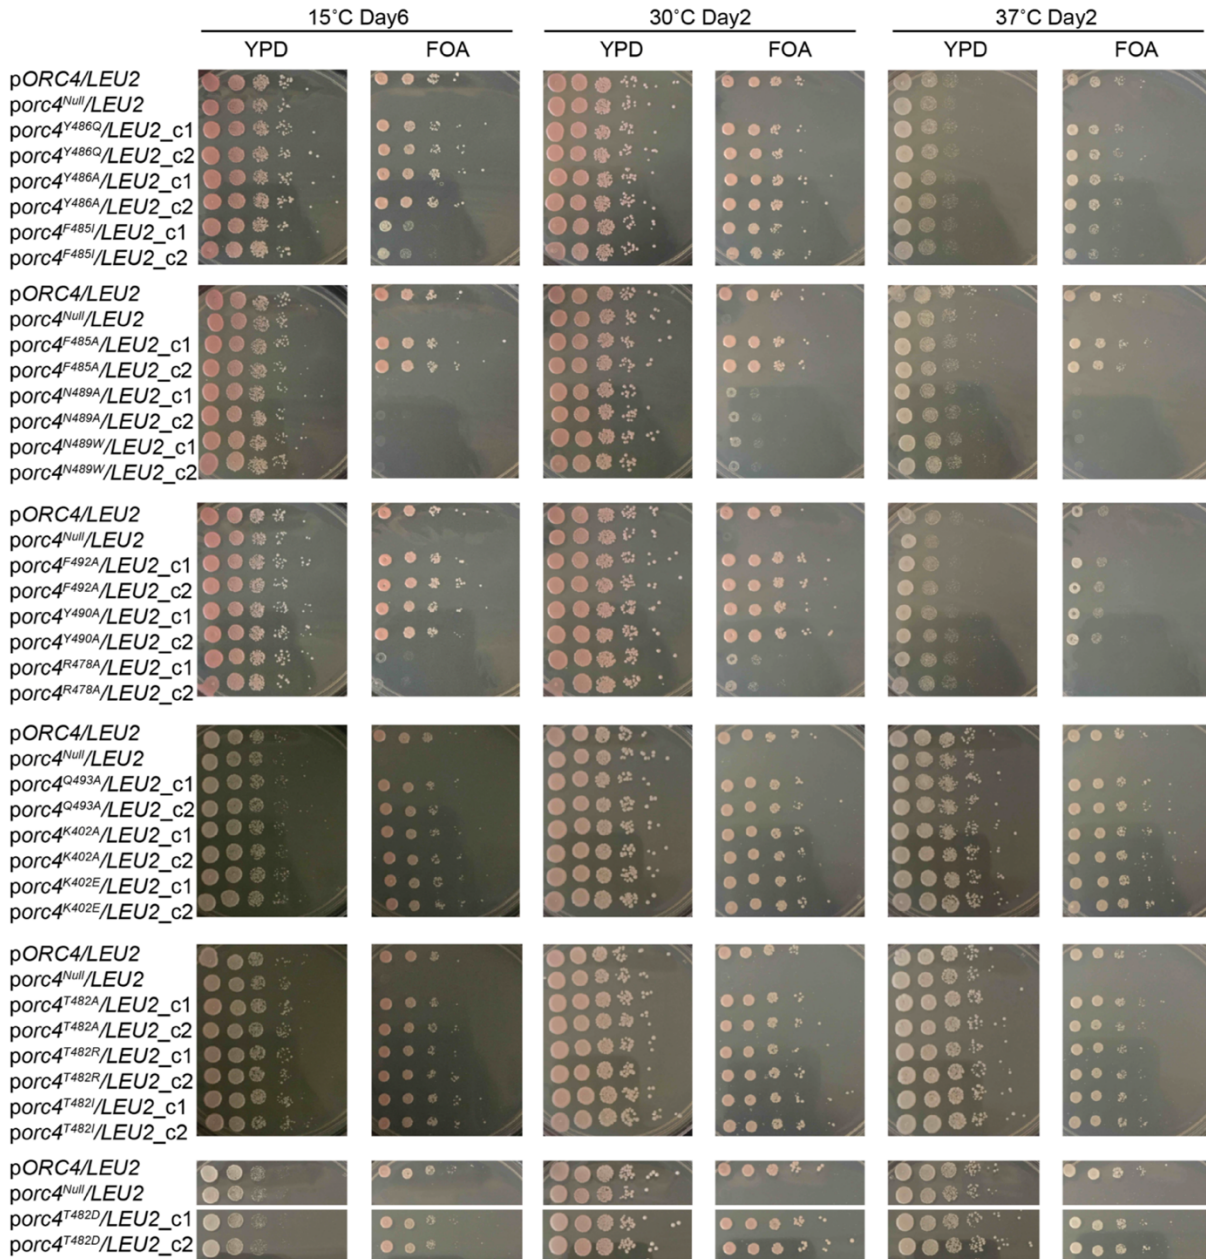



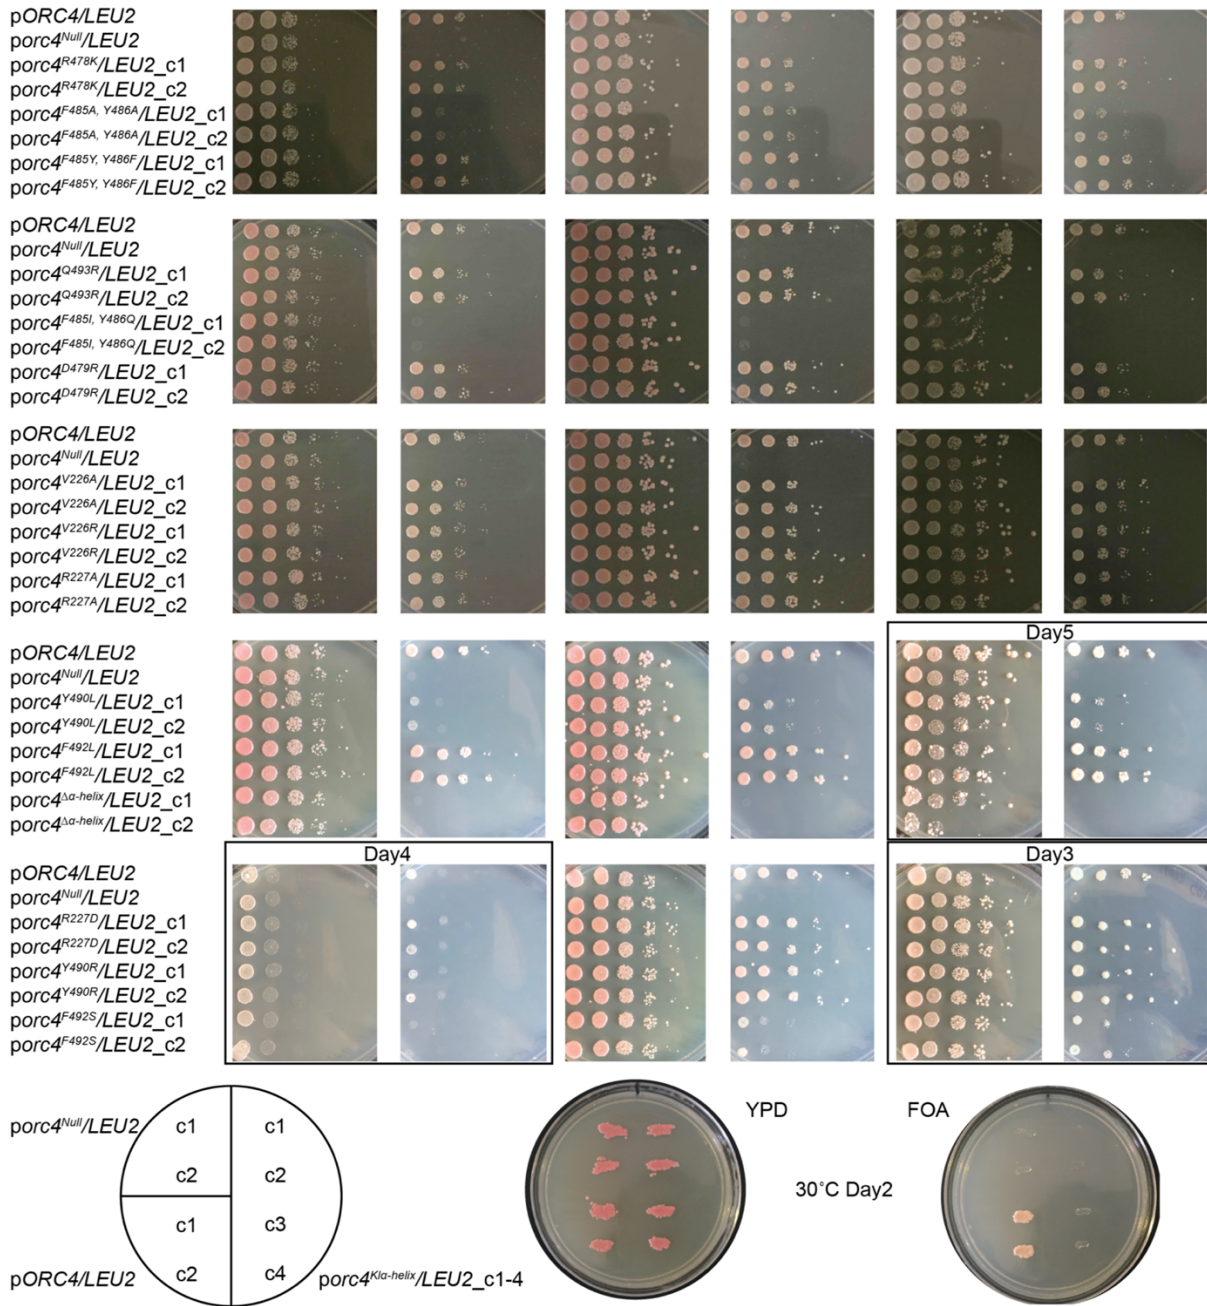

**Supplementary Fig. 2 | Orc4 mutants viability phenotypes in plasmid shuffle assay.** Detailed procedure of plasmid shuffle assay is described in Method, Plasmid shuffle assay. Briefly, strains (*orc4Δ::TRP1* + pORC4/URA3 + *porc4*<sup>tested allele</sup>/LEU2) were grown overnight in YPD and spotted onto 5-FOA plates with 10-fold serial dilutions starting from 1.5x10<sup>7</sup> cells and spotted onto YPD plates as control. Mutations were indicated. Strain (*orc4Δ::TRP1* + pORC4/URA3 + pORC4/LEU2) and strain (*orc4Δ::TRP1* + pORC4/URA3 + *porc4*<sup>null</sup>/LEU2) were spotted as controls. Biological duplicates are denoted as c1 and c2. Plates were cultured under 25°C, 30°C, or 37°C for different days (as indicated) to test their cold or temperature sensitivity. *Orc4* mutant phenotypes summarized in Supplementary Table 1.

*orc2Δ::TRP1* + *pORC2/URA3* + plasmid indicated below:

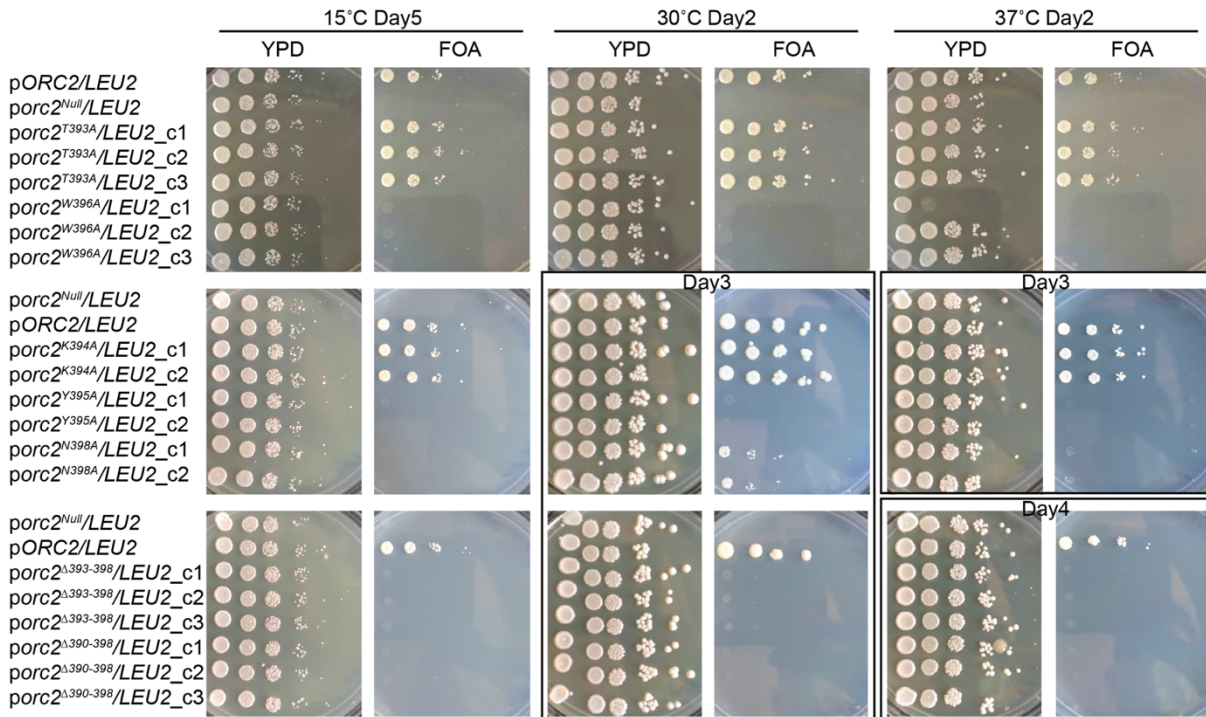

**Supplementary Fig. 3 | *Orc2* mutants viability phenotypes in plasmid shuffle assay.** Detailed procedure of plasmid shuffle assay is described in Method, Plasmid shuffle assay. Briefly, strains (*orc2Δ::TRP1* + *pORC2/URA3* + *porc2<sup>tested allele</sup>/LEU2*) were grown overnight in YPD and spotted onto 5-FOA plates with 10-fold serial dilutions starting from  $1.5 \times 10^7$  cells and spotted onto YPD plates as control. Mutations were indicated. Strain (*orc2Δ::TRP1* + *pORC2/URA3* + *pORC2/LEU2*) and strain (*orc2Δ::TRP1* + *pORC2/URA3* + *porc2<sup>null</sup>/LEU2*) were spotted as controls. Biological duplicates are denoted as c1 and c2. Plates were cultured under 25°C, 30°C, or 37°C for different days (as indicated) to test their cold or temperature sensitivity. *Orc2* mutant phenotype summarized in Supplementary Table 2.

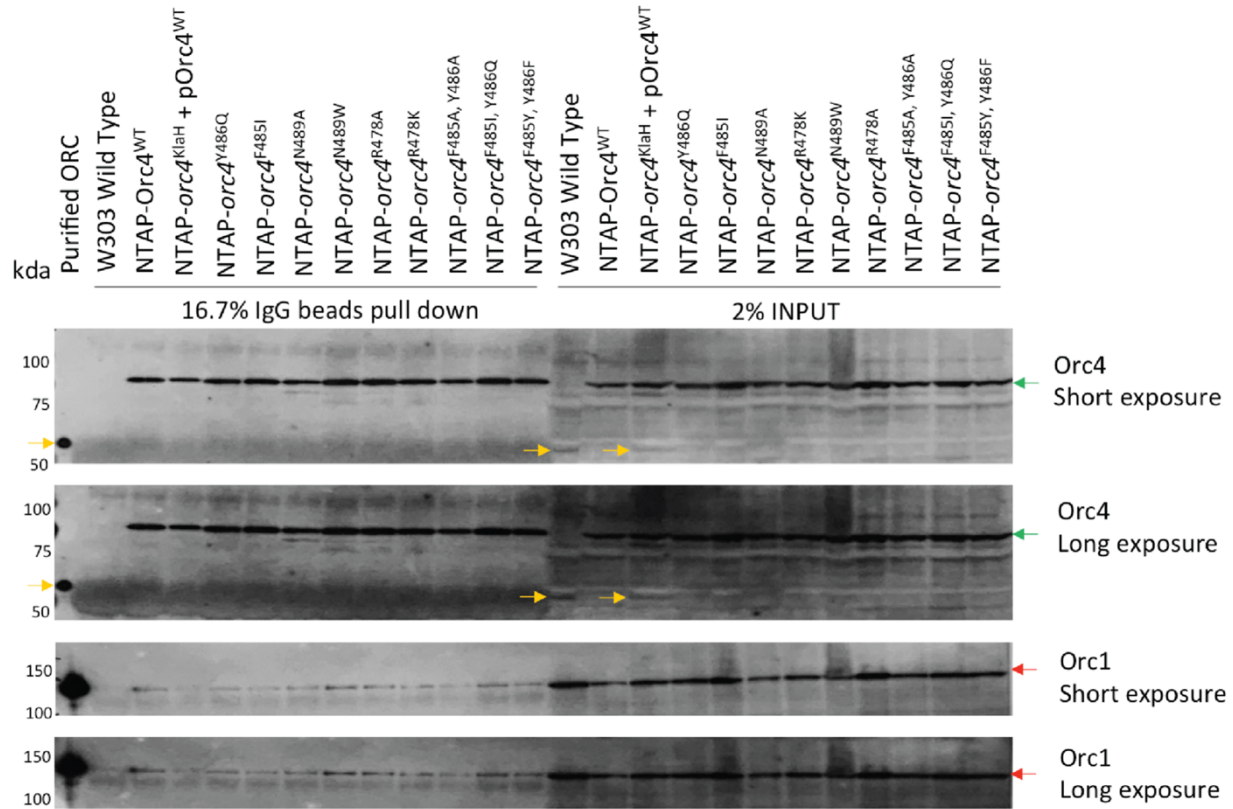

**Supplementary Fig. 4 | Orc4 protein expression detection and ORC complex formation detection.** Details of method is described in Method, Cell extract preparation, immunoprecipitation, immunoblot analysis and antibodies. NTAP-tagged Orc4 were immunoprecipitated via incubation with IgG beads. Wild type W303 strain, which contains non-tagged Orc4, is used parallelly as a control of pulldown assay. 2% of input and 16.7% of pulled-down lysate were loaded and subsequently immunoblot with anti-Orc4 (SB12) and anti-Orc1 (SB13). Purified ORC complex (including Orc1 and non-tagged Orc4) was also loaded as control for immunoblotting of Orc1 and Orc4. NTAP-tagged Orc4 is around 83kDa (indicated with green arrows) and non-tagged Orc4 is around 56kDa (indicated with yellow arrows), while Orc1 is around 120kDa (indicated with red arrows). Both short and long exposure of blots are indicated. Source data are provided as a Source Data file.



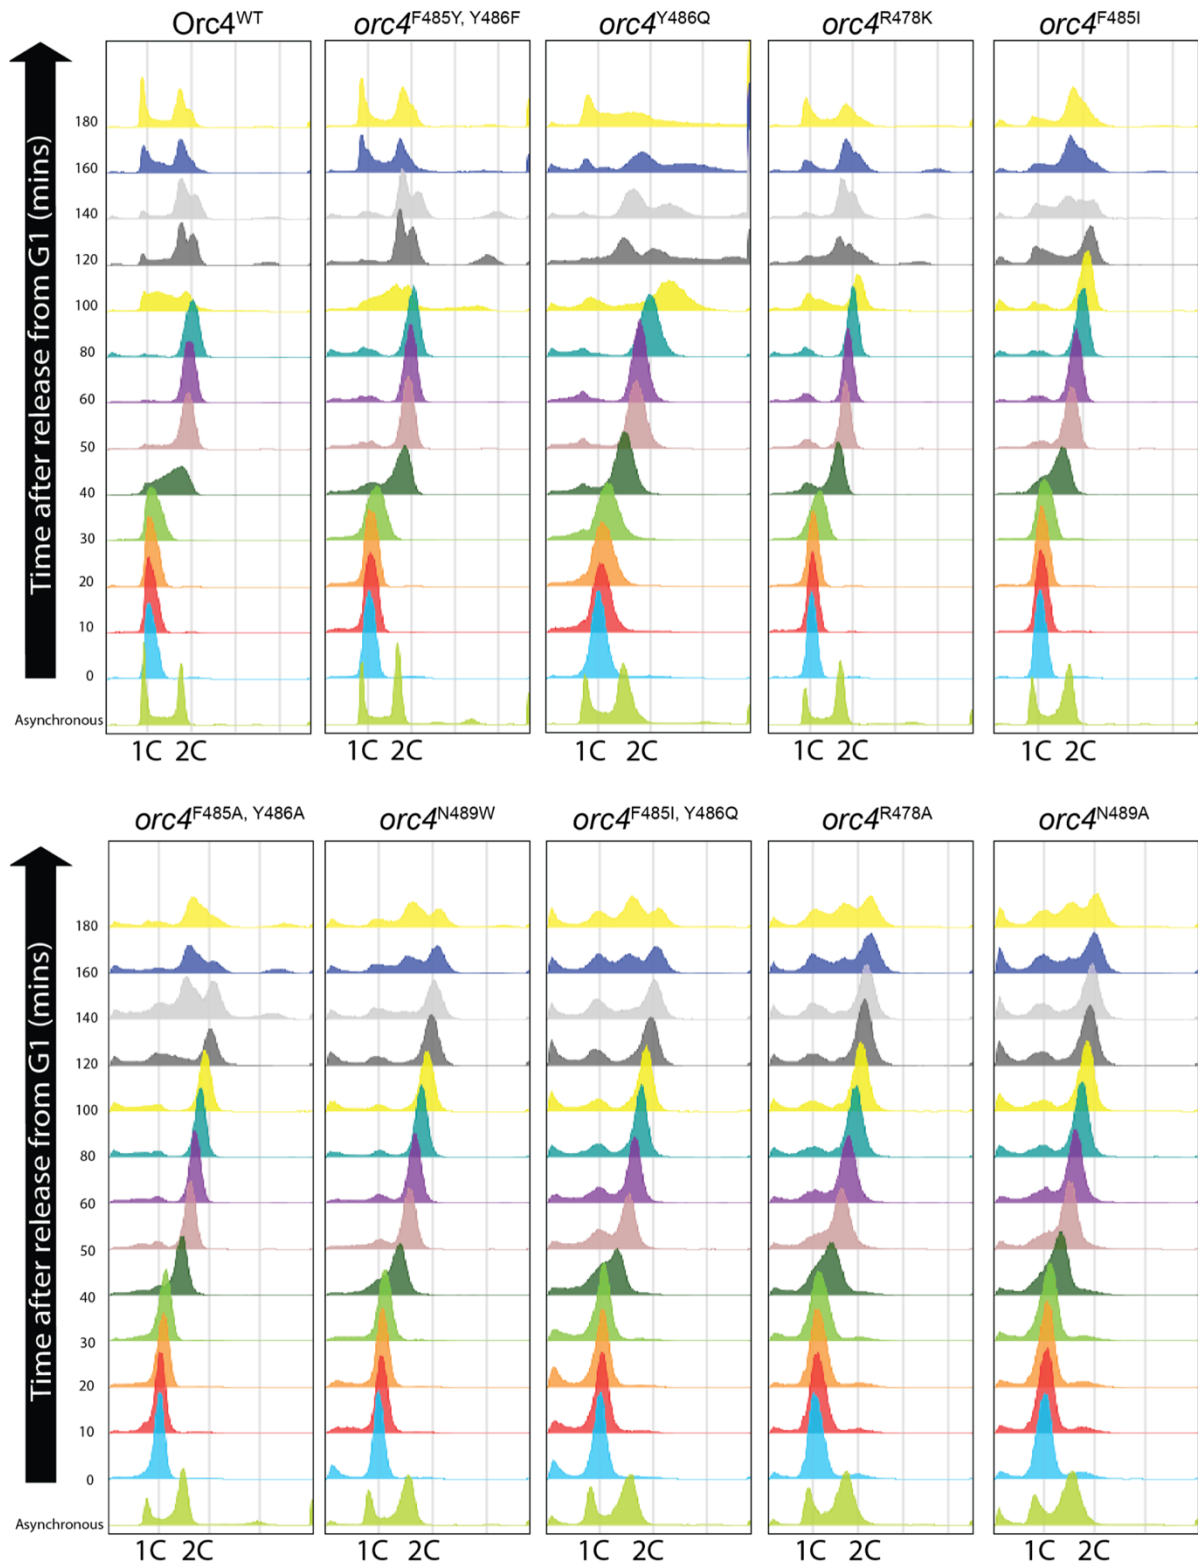

**Supplementary Fig. 5 | Cell cycle of NTAP-Orc4 integrated strains.** Flow cytometry was done by growing cells into log phase, arresting at G1 phase with  $\alpha$ -factor block for 3 hours (around 1~2

cell cycle time length) and then releasing into S phase for different time point (as indicated above on the left). Different time points were harvest and prepared for flow cytometry with method previously described<sup>50</sup>. DNA strained with SYBR green. *Orc4* mutants seemed to have hard time going through S phase and progression through mitosis.



a

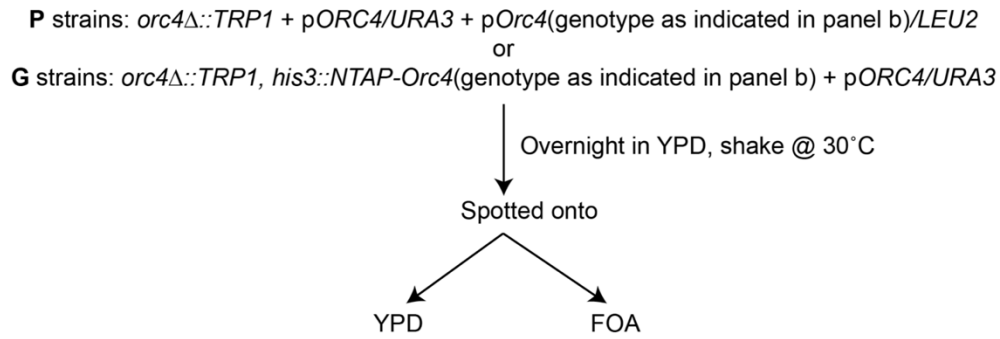

b

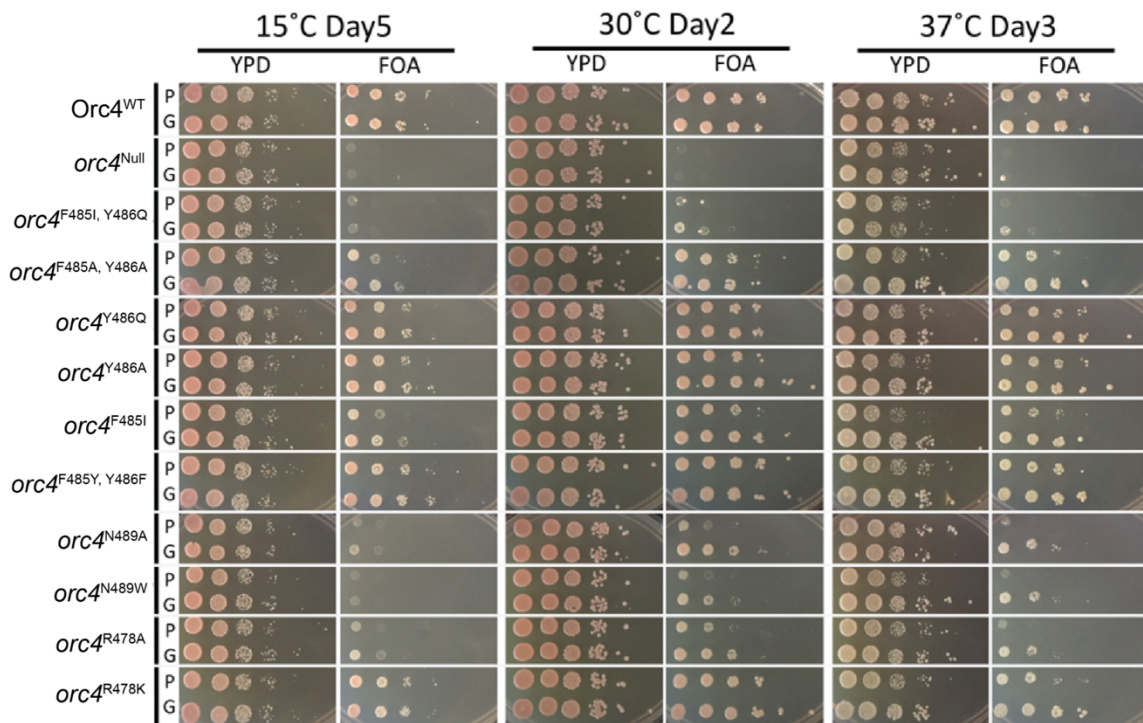

**Supplementary Fig. 6 | Analysis of plasmid borne and genome integrated *Orc4* mutants.** a, Schematic diagram of viability comparison assay between strains surviving dependent on single episomal origin (*Orc4* on plasmid, denoted as [P]) or multiple chromosomal origins (*Orc4* integrated into genome, denoted as [G]). The [P] strain relies on a CEN-based plasmid with a single replication origin to carry the tested *Orc4* mutation and is therefore stringent. b, [P] strains (*orc4*::*TRP1* + p*ORC4/URA3* + *porc4/LEU2*) and [G] strains (*his3*::*NTAP-orc4*<sup>mut</sup>, *orc4*::*TRP1*, *bar1* $\Delta$ ::*TRP1*, *LEU2*::*BrdU-Inc* + p*Orc4/URA3*) were grown overnight in YPD and spotted onto 5-FOA plates with 10-fold serial dilutions starting from  $1.5 \times 10^7$  cells and spotted onto YPD plates as control. As controls for [P] strains, strain (*orc4*::*TRP1* + p*ORC4/URA3* + p*ORC4/LEU2*) and strain (*orc4*::*TRP1* + p*ORC4/URA3* + *porc4*<sup>null</sup>/*LEU2*) were spotted. As controls for [G] strains, strain (*his3*::*NTAP-Orc4*<sup>WT</sup>, *orc4*::*TRP1*, *bar1* $\Delta$ ::*TRP1*, *LEU2*::*BrdU-Inc* + p*Orc4/URA3*) and strain (*orc4*::*TRP1*, *bar1* $\Delta$ ::*TRP1*, *LEU2*::*BrdU-Inc* + p*Orc4/URA3*) were spotted. Plates were cultured under 25°C, 30°C, or 37°C for different days (as indicated) to test their temperature sensitivity. The strain lacking a NTAP-tagged *Orc4* did not grow on FOA. The viability deficient

phenotype of *Orc4* mutants on single-origin plasmid seemed to be partially rescued when the mutants are integrated into the genome and survive on multiple origins.

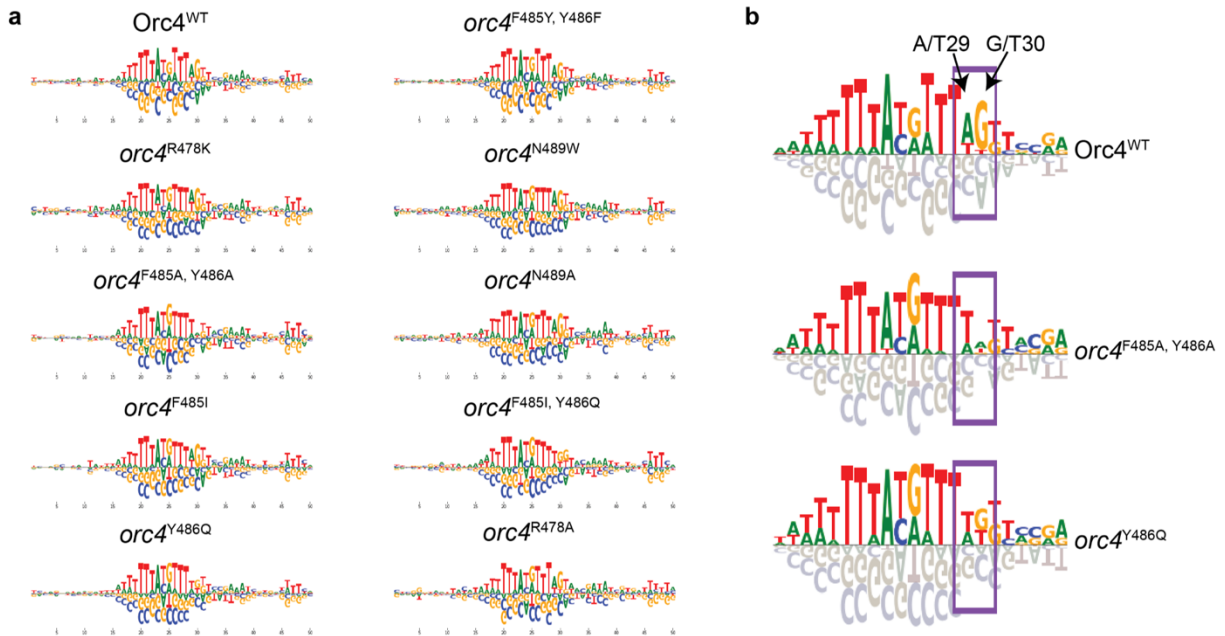

**Supplementary Fig. 7 | ARS motif logos generated from MPOS assay using *ARS317* mutations.** **a**, ARS motif logos for *Orc4* integrated strains at A and B1 elements generated using mutation library with *ARS317* sequence backbone. Same as Fig 3, top-half of logos representing the origin sequences that were selected-for in MPOS assay and bottom-half of logos representing the origin sequences that were selected-against in MPOS assay. **b**, Magnified view of A element region in a logo from *Orc4*<sup>WT</sup>, *orc4*<sup>F485A, Y486A</sup>, *orc4*<sup>Y486Q</sup> strains with bottom-half of logo faded. Dark purple circles indicate the major changes at A/T29, G/T30 logo positions in the *Orc4* mutant strains.

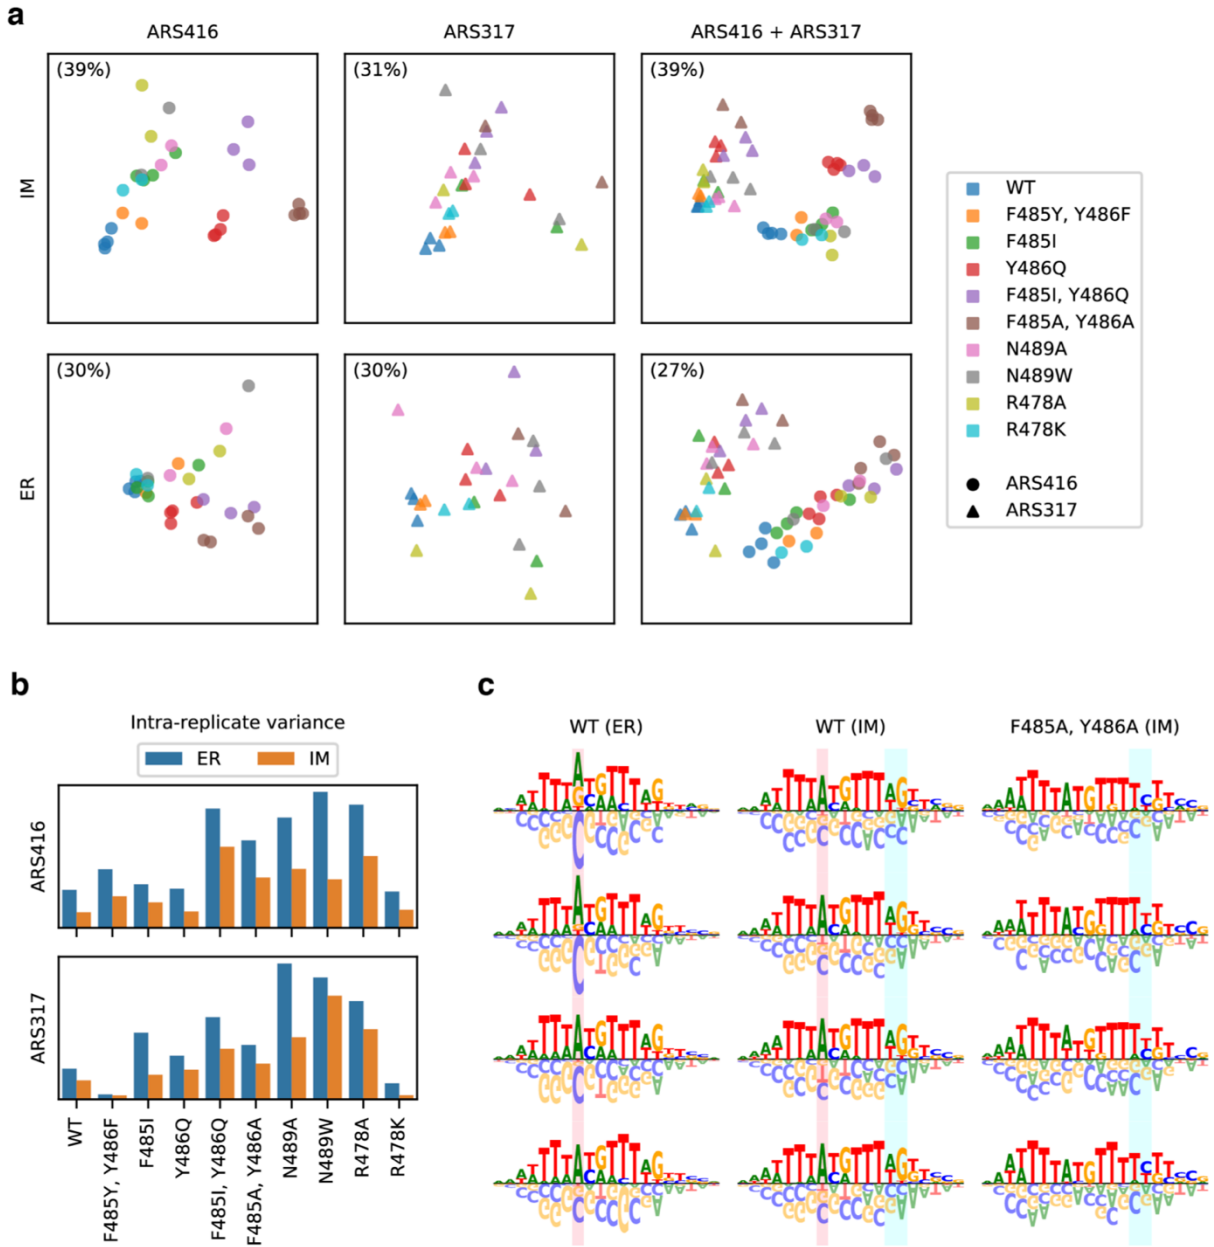

**Supplementary Fig. 8 | Principal component analysis and comparison of motif inference methods.** **a**, PCA analyses of motifs (performed on the *ARS416* library MPOS data, the *ARS317* library MPOS data, or both libraries), and inferred using either information maximization (IM) or enrichment ratios (ER). The variance explained by the first two principal components, corresponding to the x- and y-axes of each plot, is indicated in the upper left corner. The dots within each plot represent biologically independent MPOS experiments, dot color indicates the *Orc4* variant assayed, and dot shape indicates the library of mutated ARSs used as input. Note that motifs cluster according to the *Orc4* variant assayed, and that this clustering is stronger for information maximization (IM)-inferred motifs compared to enrichment ratio (ER)-inferred motifs. **b**, Total variance across the motifs inferred for each *Orc4* variant using either ER or IM inference. IM inference consistently yielded less intra-replicate variance than ER inference (48.3%

less on average for *ARS416* motifs and 39.9% less for *ARS317* motifs). This again reflects the robustness of IM inference in the face of experiment-to-experiment variation. **c**, Logos showing the *ARS416* motifs for two *Orc4* variants. For clarity, only 20 bp encompassing the essential A element are shown. ER motifs exhibited substantially more variability at key positions than did IM motifs (e.g. rose highlighted positions). *Orc4* mutants resulted in consistently and clearly visible differences in the inferred IM motifs (e.g. cyan positions).



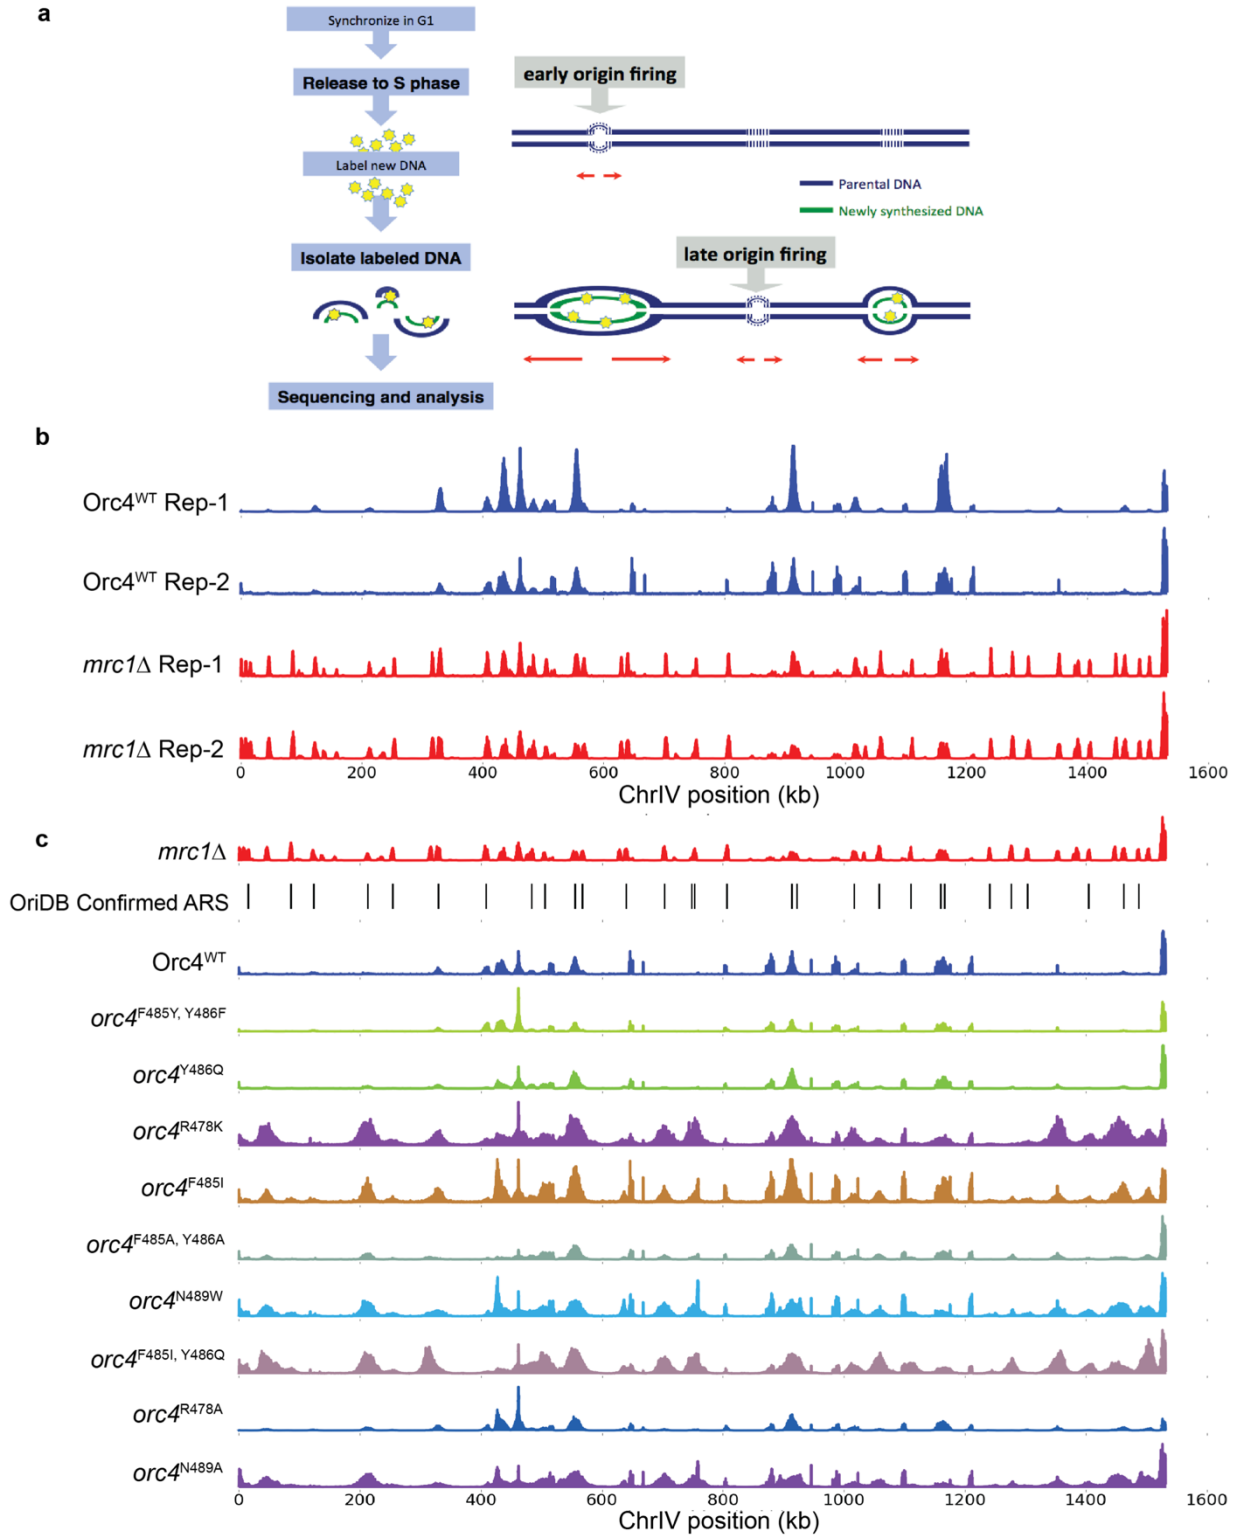

**Supplementary Fig. 9 | Replicates of genome-wide replication origin profile.** **a**, Schematic diagram for genome-wide replication origin profile analysis. Details of method is described in Methods, Genome-wide replication origin profile analysis. Briefly, Yeast cells were  $\alpha$ -factor

blocked in G1 phase for 3 hours and then released into the growth medium (YPD with 200mM HU, 500uM EdU and 0.2mg/ml pronase E) for 90mins before harvest. Flow cytometry was done to check the stage of the cells. DNA is isolated from the harvested cells and sonicated using Bioruptor. EdU labeled newly synthesized DNA is pulldown by Click-iT chemistry with biotinylated azide and Streptavidin T1 magnetic beads. Then Illumina TruSeq Kit is used to establish and amplify the sequencing library. Sequencing data is then analyzed to show peaks on newly synthesized DNA with detailed computational method in Method, Computational analyses of replication origin profile and CHIP-seq data. **b-c**, Replicates of origin firing profiles in Fig. 3. Chromosome IV(ChrIV) is used as representation and replicates are from two independent experiments. **b** shows the direct comparison of two replicates with profiles from *Orc4<sup>WT</sup>* and *mrc1Δ* strains shown as examples. **c** shows the genome-wide replication origin firing profiles from the all strains in replicate experiment.

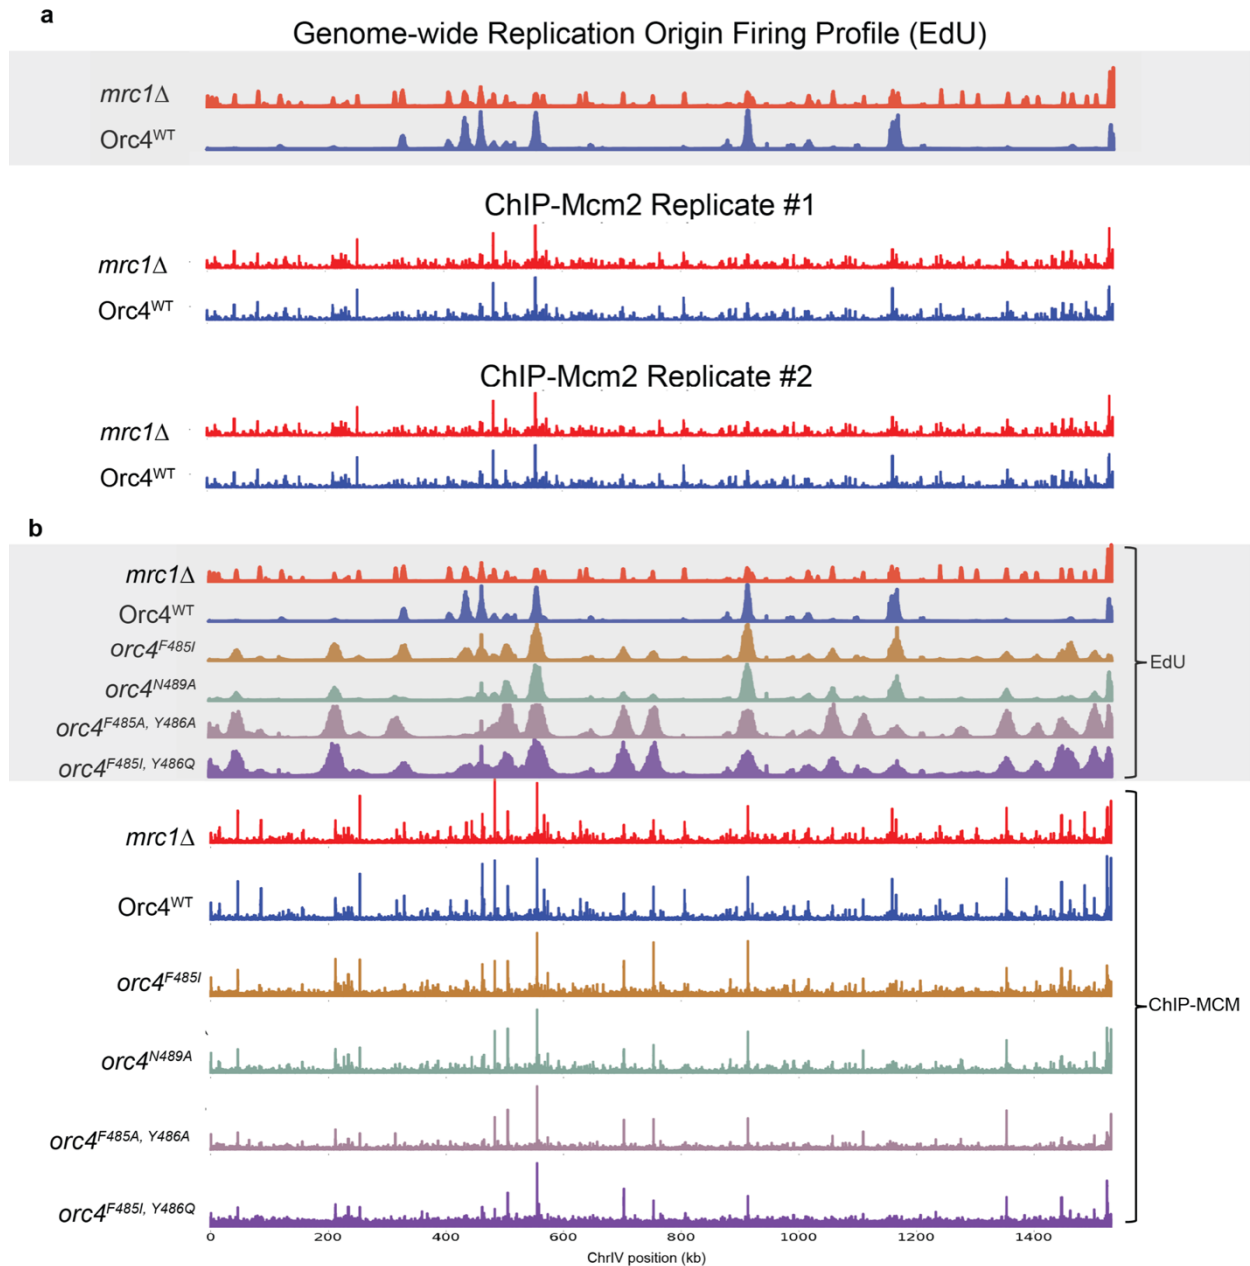

**Supplementary Fig. 10 | Chromatin immuno-precipitation (ChIP) of MCM in *Orc4* strains.** **a-b**, ChIP profile of MCM (anti-Mcm2) in G1 phase (*Orc4<sup>WT</sup>*, *orc4<sup>F485I, Y486Q</sup>* and *mrc1Δ* profiles in Fig. 3). Chromosome IV(ChrIV) is used as representation. Genome-wide replication origin firing profiles from Fig. 3 is attached for better reference of origin firing pattern and are shadowed in grey. **a** shows the direct comparison of two independent replicates with Mcm2-ChIP profiles from *Orc4<sup>WT</sup>* and *mrc1Δ* strains shown as examples. **b** shows the Mcm2-ChIP profiles of the all the strains from one of the two replicates.

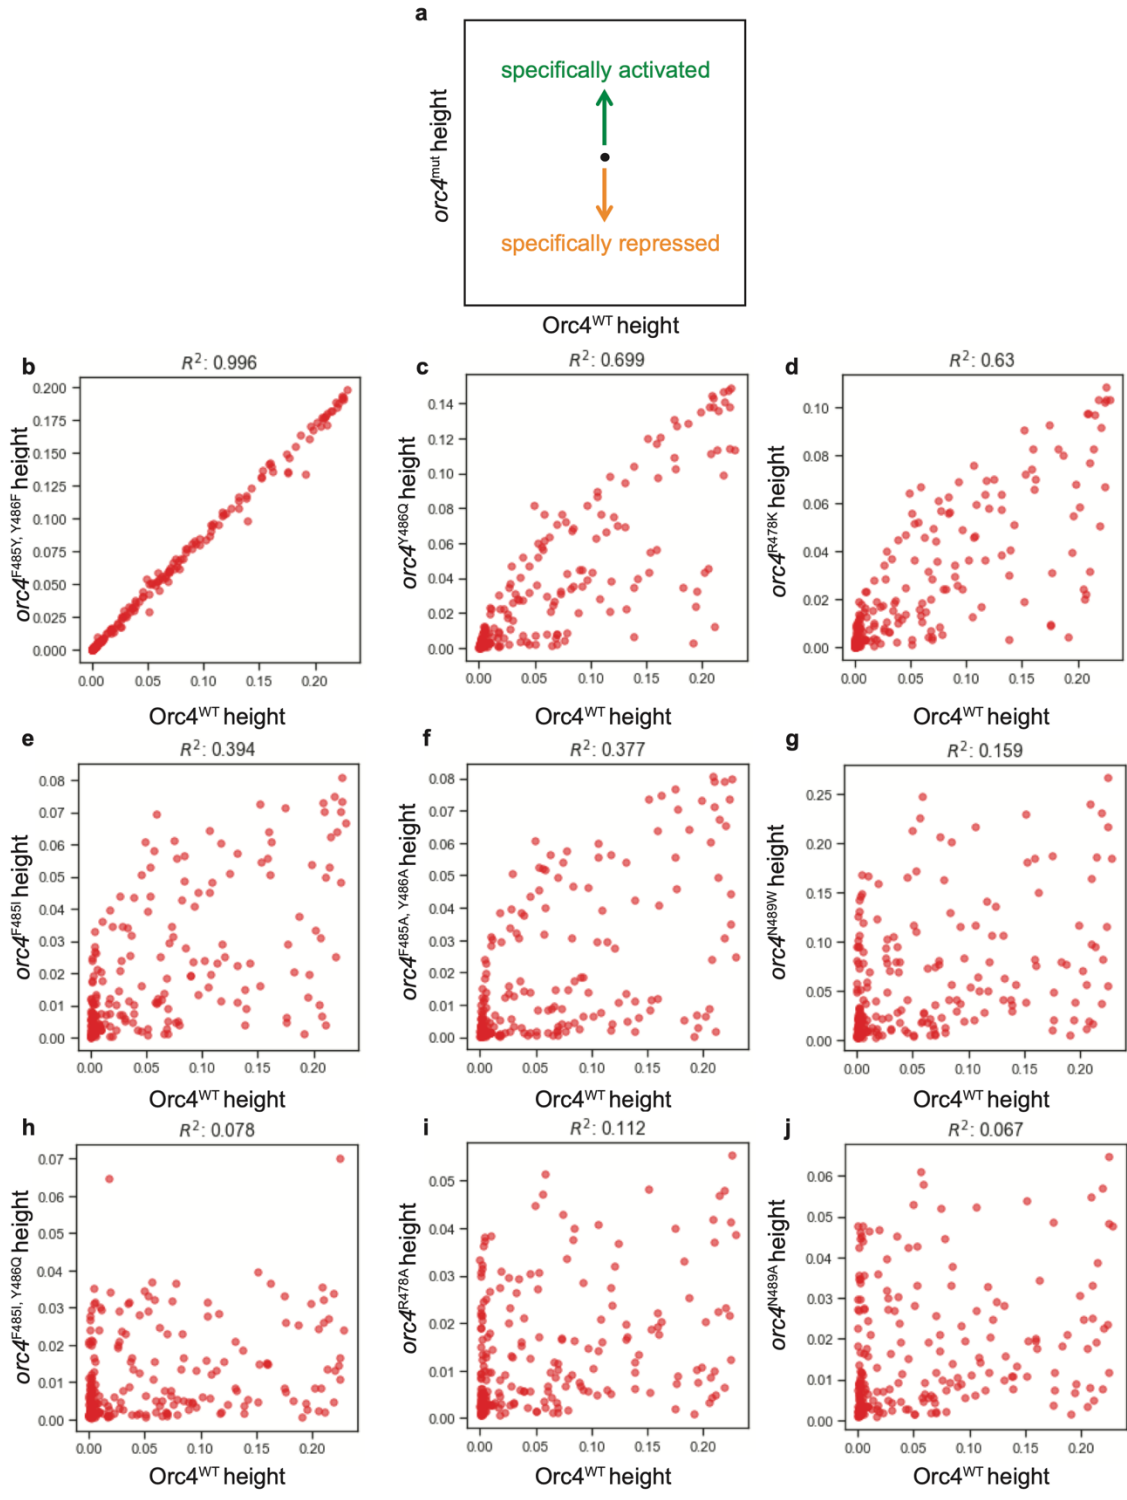

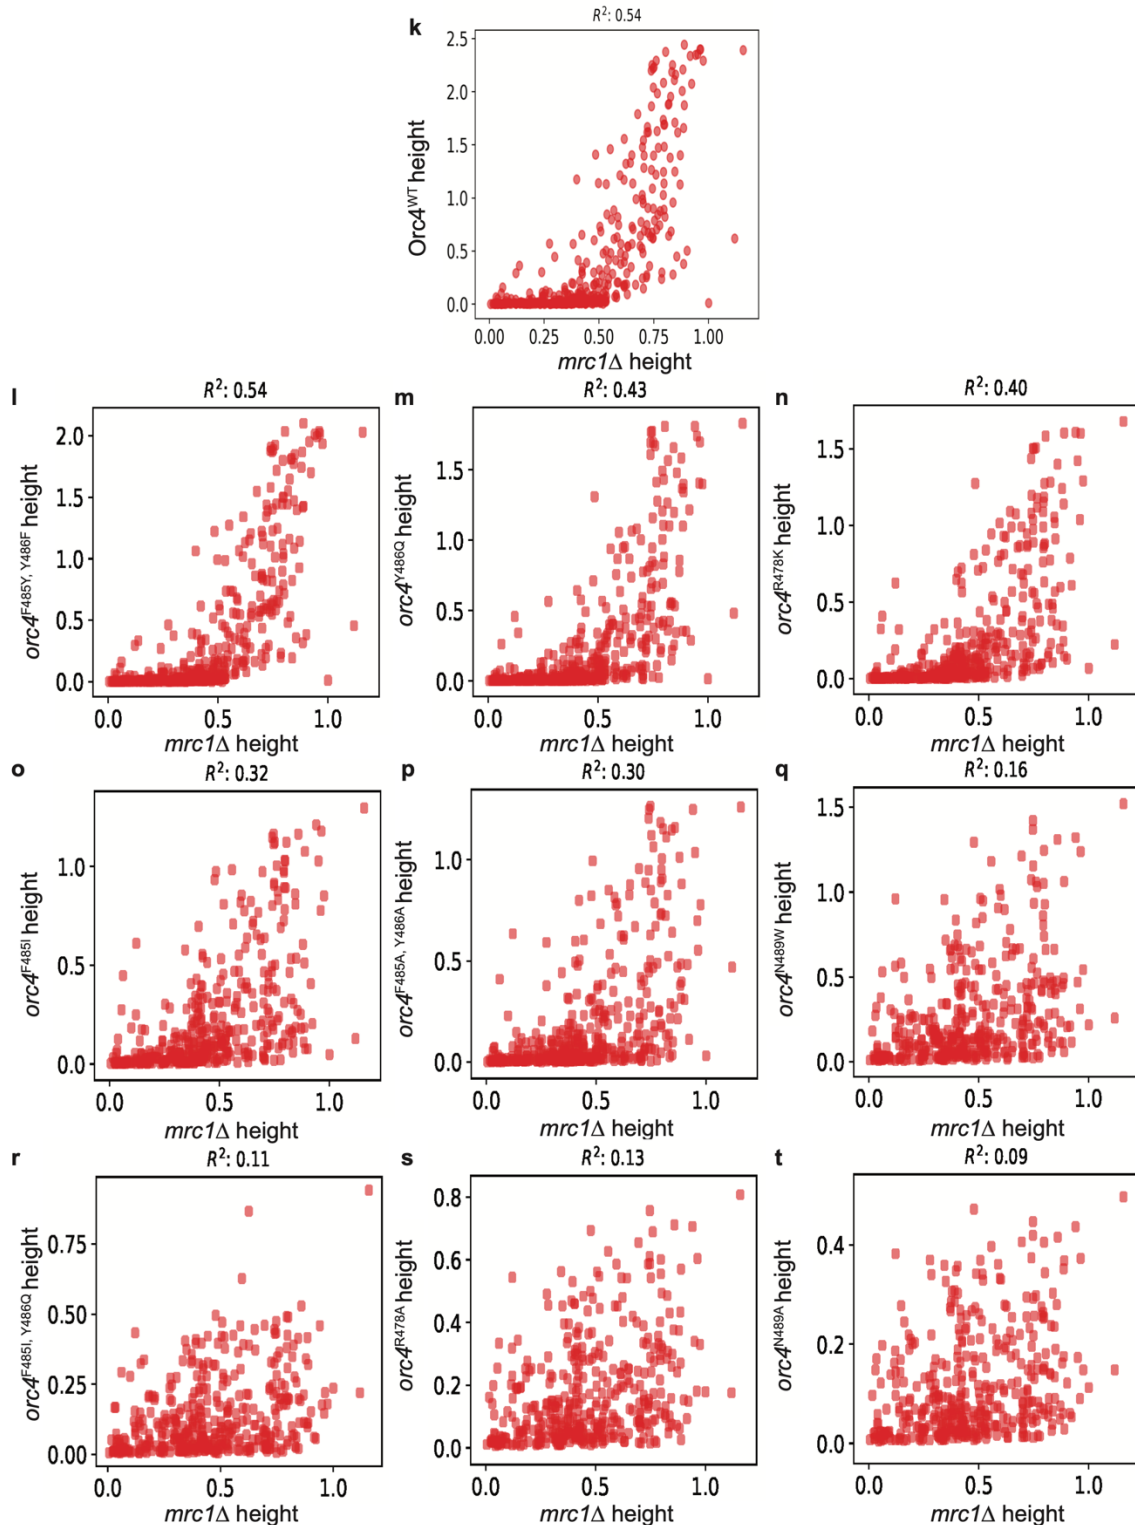

**Supplementary Fig. 11 | Genomic origin firing peak heights scatter plot comparisons.** Each dot represent a single replication origin that has its origin firing peak height in *Orc4*<sup>WT</sup> (in **b-j**) or *mrc1*Δ (in **k-t**) as the x-value and its origin firing peak height in *orc4*<sup>mut</sup> (in **b-j, l-t**) or *Orc4*<sup>WT</sup> (in **k**) as y-value. Two origins exhibited aberrantly large height values, believed to have arisen from read mapping artefacts, and were removed from this analysis. Height values are normalized by



computing the number of reads bounding 99.5% of positions within each profile and divided the entire profile by this number. Coefficient of determination values ( $R^2$ ) are shown atop each panel. **a**, Illustration diagram for **b-j** showing the directions of activation (in green) and repression (in orange) for each replication origin (denote as black dot) in *orc4* mutant strains. **b-j**, *orc4*<sup>mut</sup> strains direct comparison with *Orc4*<sup>WT</sup> strain. **k-t**, all ten *Orc4* strains direct comparison with *mrc1* $\Delta$  strain.

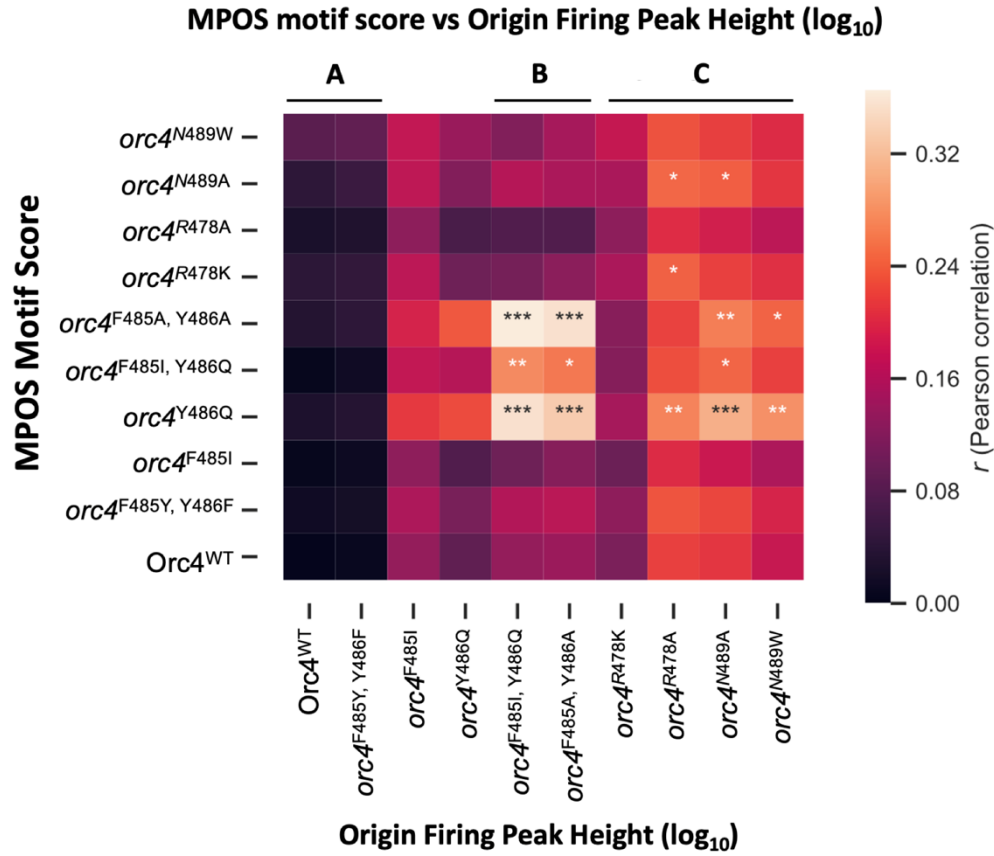

**Supplementary Fig. 12 | Correlation of genomic origin peak height and MPOS motif scores.** DNA sequences under origin firing peaks that were predicted to be ACS were obtained from OriDB<sup>13,37</sup> and used for analysis. MPOS motif scores were assigned by how good the annotated ACSs matched to the MPOS motifs. Correlations between origin firing peak heights (in  $\log_{10}$ ) and MPOS motif scores were evaluated for each annotated ACS. A section indicates the origin peak heights in wild-type strain or wild-type like *orc4* mutant control strain. We took late vs early origin factors into consideration. However, a large value in origin height does not guarantee a high MPOS motif score. B section indicates the *orc4* F485 and Y486 mutants that were shown to have their origin sequence recognition altered (Fig. 2c and Fig. 4). C section indicates the *orc4* R478 and N489 mutation strains. P-values were also computed to assess the null hypothesis that  $\log$  EdU heights and motif scores are not correlated; all P-values were Bonferoni corrected (by multiplying by the total number of tests). Significant correlations were indicated: \* $p < 0.05$ , \*\* $p < 0.01$ , \*\*\* $p < 0.001$ .

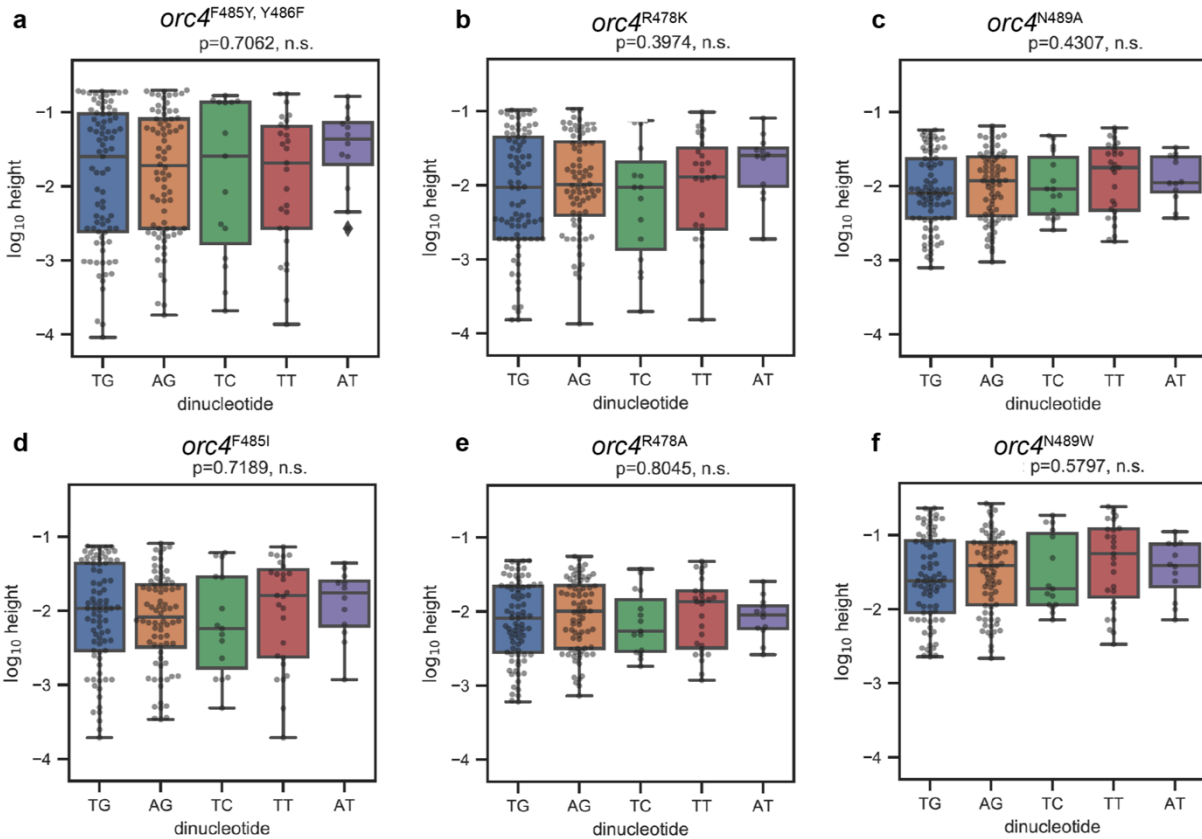

**Supplementary Fig. 13 | Non-Y486 *orc4* mutants efficiently use origins with the “AG” dinucleotide.** Supplemental figure for Fig. 4. Box plots for the 6 *orc4* mutant strains that do not have Y486 changed, except for the *orc4*<sup>F485Y, Y486F</sup> strain that contains a conserved mutation whose strain grows similar to *Orc4*<sup>WT</sup> and therefore is an exception of Y486 mutation strain. **a.** *orc4*<sup>F485Y, Y486F</sup>, **b.** *orc4*<sup>R478K</sup>, **c.** *orc4*<sup>N489A</sup>, **d.** *orc4*<sup>F485I</sup>, **e.** *orc4*<sup>R478A</sup>, **f.** *orc4*<sup>N489W</sup>. Y-axis is genomic origin firing peak heights in log<sub>10</sub>. Each dot denotes an annotated ACS. Box plots elements: the minimum height, first (lower) quartile, median, third (upper) quartile, and maximum height. Diamond denotes outliers that exhibited aberrantly large values.

## Supplementary Tables

| Orc4 Mutation         | Phenotype                                    |
|-----------------------|----------------------------------------------|
| KI $\alpha$ -helix    | # @30°C (N=4)                                |
| $\Delta\alpha$ -helix | # @all three temperature (N=2)               |
| F485I, Y486Q          | *** @30°C; # @15°C (CS); # @37°C (TS) (N=3)  |
| N489W                 | *** @30°C; # @15°C (CS); # @37°C (TS) (N=3)  |
| N489A                 | *** @30°C; # @15°C (CS); # @37°C (TS) (N=3)  |
| R478A                 | ** @30°C; *** @15°C (CS); # @37°C (TS) (N=3) |
| F485I                 | * @30°C; ** @15°C (CS); * @37°C (N=3)        |
| F485A, Y486A          | * @30°C; ** @15°C (CS); * @37°C (N=3)        |
| Y490L                 | * @30°C; ** @15°C (CS); * @37°C (N=2)        |
| F492S                 | * @30°C; ** @15°C (CS); * @37°C (N=2)        |
| R478K                 | - @all three temperature (N=3)               |
| Y486Q                 | - @all three temperature (N=3)               |
| F485A                 | ~ @30°C; - @15°C; ~ @37°C (N=3)              |
| Y486A                 | ~ @30°C; - @15°C; ~ @37°C (N=3)              |
| Y490A                 | ~ @30°C; - @15°C; ~ @37°C (N=3)              |
| F492A                 | ~ @30°C; - @15°C; ~ @37°C (N=3)              |
| Q493R                 | ~ @all three temperature (N=2)               |
| D479R                 | ~ @all three temperature (N=2)               |
| V226A                 | ~ @all three temperature (N=2)               |
| V226R                 | ~ @all three temperature (N=2)               |
| R227A                 | ~ @all three temperature (N=2)               |
| Q493A                 | ~ @all three temperature (N=3)               |
| K402A                 | ~ @all three temperature (N=3)               |
| K402E                 | ~ @all three temperature (N=3)               |
| T482D                 | ~ @all three temperature (N=5)               |
| T482R                 | ~ @all three temperature (N=3)               |
| T482A                 | ~ @all three temperature (N=3)               |
| T482I                 | ~ @all three temperature (N=3)               |
| F485Y, Y486F          | ~ @all three temperature (N=3)               |
| Y490R                 | ~ @all three temperature (N=3)               |
| F492L                 | ~ @all three temperature (N=3)               |
| R227D                 | ~ @all three temperature (N=3)               |

Symbols denotes viability deficient phenotypes. ~ denotes minimal or not deficient; - denotes slightly deficient; \* denotes moderate deficient; \*\* denotes strong deficient; \*\*\* denotes severe deficient; # denotes lethal

**Supplementary Table 1 | Summary of plasmid shuffle assay *Orc4* mutant phenotypes.**  
*Orc4* mutant viability phenotypes summarized from plasmid shuffle assay (Supplementary Fig. 1). Indicated symbols denotes different viability phenotypes.

| Orc2 Mutation    | Phenotype                                  |
|------------------|--------------------------------------------|
| $\Delta$ 390-398 | # @all three temperature (N=2)             |
| $\Delta$ 393-398 | # @all three temperature (N=2)             |
| W396A            | # @all three temperature (N=3)             |
| Y395A            | # @all three temperature (N=2)             |
| N398A            | ** @30°C; # @15°C (CS); # @37°C (TS) (N=2) |
| T393A            | ~ @all three temperature (N=3)             |
| K394A            | ~ @all three temperature (N=2)             |

Symbols denotes viability deficient phenotypes. ~ denotes minimal or not deficient; - denotes slightly deficient; \* denotes moderate deficient; \*\* denotes strong deficient; \*\*\* denotes severe deficient; # denotes lethal

**Supplementary Table 2 | Summary of plasmid shuffle assay *Orc2* mutant phenotypes.**  
*Orc2* mutant viability phenotypes summarized from plasmid shuffle assay (Supplementary Fig. 2). Indicated symbols denotes different viability phenotypes.



| Orc4 Integrated Strains | Doubling Time |
|-------------------------|---------------|
| WT                      | 87mins        |
| F485Y, Y486F            | 89mins        |
| Y486Q                   | 91mins        |
| R478K                   | 91.5mins      |
| F485I                   | 93mins        |
| F485A, Y486A            | 97mins        |
| N489W                   | 112mins       |
| F485I, Y486Q            | 127mins       |
| R478A                   | 132mins       |
| N489A                   | 134.5mins     |

**Supplementary Table 3 | Summary of doubling time of NTAP-Orc4 integrated strains.**

Doubling time were calculated based on growth curves (see Fig. 1f) log phase cell concentration.

$$k = \frac{\Delta \log(\text{Cell Conc.})}{\Delta \text{Time}} = \frac{\log(2)}{\text{Doubling Time}} \quad (4)$$

$$\text{Doubling Time} = \log(2) / k \quad (5)$$

k dictates the slope of linear regression line of growth curves log phase.

## Supplementary Methods

| Strain  | Genotype                                                                                                                                                               | Source     |
|---------|------------------------------------------------------------------------------------------------------------------------------------------------------------------------|------------|
| YB51    | <i>MAT<math>\alpha</math> orc4::TRP1 ade2-1 ura3-1 his 3-11, 15 trp1-1 leu2-3,112 can1-100 + pRS415/ORC4</i>                                                           | This lab   |
| YS856   | <i>MAT<math>\alpha</math> ade2-1 ura3-1 his3-11, 15 trp1-1 leu2-3,112 can1-100</i>                                                                                     | This study |
| YB410   | <i>MAT<math>\alpha</math> orc2::TRP1 ade2-1 ura3-1 his 3-11, 15 trp1-1 leu2-3,112 can1-100 + pRS316/ORC2</i>                                                           | This lab   |
| YS3285  | <i>MAT<math>\alpha</math> mrc1<math>\Delta</math>::KanMX6 bar1<math>\Delta</math>::TRP1 URA3::BrdU-<i>Inc</i> ade2-1 ura3-1 his3-11, 15 trp1-1 leu2-3,112 can1-100</i> | This study |
| YB 1519 | <i>MAT<math>\alpha</math> orc4::TRP1 ade2-1 ura3-1 his 3-11, 15 trp1-1 leu2-3,112 can1-100 + pRS416/ORC4 + pRS415/ORC4</i>                                             | This study |
| YB 1515 | <i>MAT<math>\alpha</math> orc4::TRP1 ade2-1 ura3-1 his 3-11, 15 trp1-1 leu2-3,112 can1-100 + pRS416/ORC4 + pRS415</i>                                                  | This study |
| YB1639  | <i>MAT<math>\alpha</math> orc4::TRP1 ade2-1 ura3-1 his 3-11, 15 trp1-1 leu2-3,112 can1-100 + pRS416/ORC4 + pRS415/orc4<math>\Delta</math><math>\alpha</math>-helix</i> | This study |
| YB 1514 | <i>MAT<math>\alpha</math> orc4::TRP1 ade2-1 ura3-1 his 3-11, 15 trp1-1 leu2-3,112 can1-100 + pRS416/ORC4 + pRS415/orc4K1<math>\alpha</math>-helix</i>                  | This study |
| YB 1520 | <i>MAT<math>\alpha</math> orc4::TRP1 ade2-1 ura3-1 his 3-11, 15 trp1-1 leu2-3,112 can1-100 + pRS416/ORC4 + pRS415/orc4Y486Q</i>                                        | This study |
| YB 1521 | <i>MAT<math>\alpha</math> orc4::TRP1 ade2-1 ura3-1 his 3-11, 15 trp1-1 leu2-3,112 can1-100 + pRS416/ORC4 + pRS415/orc4Y486A</i>                                        | This study |
| YB 1522 | <i>MAT<math>\alpha</math> orc4::TRP1 ade2-1 ura3-1 his 3-11, 15 trp1-1 leu2-3,112 can1-100 + pRS416/ORC4 + pRS415/orc4F485I</i>                                        | This study |
| YB 1523 | <i>MAT<math>\alpha</math> orc4::TRP1 ade2-1 ura3-1 his 3-11, 15 trp1-1 leu2-3,112 can1-100 + pRS416/ORC4 + pRS415/orc4F485A</i>                                        | This study |
| YB 1524 | <i>MAT<math>\alpha</math> orc4::TRP1 ade2-1 ura3-1 his 3-11, 15 trp1-1 leu2-3,112 can1-100 + pRS416/ORC4 + pRS415/orc4N489A</i>                                        | This study |
| YB 1525 | <i>MAT<math>\alpha</math> orc4::TRP1 ade2-1 ura3-1 his 3-11, 15 trp1-1 leu2-3,112 can1-100 + pRS416/ORC4 + pRS415/orc4N489W</i>                                        | This study |
| YB 1526 | <i>MAT<math>\alpha</math> orc4::TRP1 ade2-1 ura3-1 his 3-11, 15 trp1-1 leu2-3,112 can1-100 + pRS416/ORC4 + pRS415/orc4F492A</i>                                        | This study |
| YB 1527 | <i>MAT<math>\alpha</math> orc4::TRP1 ade2-1 ura3-1 his 3-11, 15 trp1-1 leu2-3,112 can1-100 + pRS416/ORC4 + pRS415/orc4Y490A</i>                                        | This study |
| YB 1528 | <i>MAT<math>\alpha</math> orc4::TRP1 ade2-1 ura3-1 his 3-11, 15 trp1-1 leu2-3,112 can1-100 + pRS416/ORC4 + pRS415/orc4R478A</i>                                        | This study |
| YB 1555 | <i>MAT<math>\alpha</math> orc4::TRP1 ade2-1 ura3-1 his 3-11, 15 trp1-1 leu2-3,112 can1-100 + pRS416/ORC4 + pRS415/orc4Q493A</i>                                        | This study |
| YB 1556 | <i>MAT<math>\alpha</math> orc4::TRP1 ade2-1 ura3-1 his 3-11, 15 trp1-1 leu2-3,112 can1-100 + pRS416/ORC4 + pRS415/orc4K402A</i>                                        | This study |
| YB 1557 | <i>MAT<math>\alpha</math> orc4::TRP1 ade2-1 ura3-1 his 3-11, 15 trp1-1 leu2-3,112 can1-100 + pRS416/ORC4 + pRS415/orc4K402E</i>                                        | This study |
| YB 1558 | <i>MAT<math>\alpha</math> orc4::TRP1 ade2-1 ura3-1 his 3-11, 15 trp1-1 leu2-3,112 can1-100 + pRS416/ORC4 + pRS415/orc4T482A</i>                                        | This study |
| YB 1559 | <i>MAT<math>\alpha</math> orc4::TRP1 ade2-1 ura3-1 his 3-11, 15 trp1-1 leu2-3,112 can1-100 + pRS416/ORC4 + pRS415/orc4T482R</i>                                        | This study |

|                |                                                                                                                                                                              |            |
|----------------|------------------------------------------------------------------------------------------------------------------------------------------------------------------------------|------------|
| <b>YB 1560</b> | <i>MAT<math>\alpha</math> orc4::TRP1 ade2-1 ura3-1 his 3-11, 15 trp1-1 leu2-3,112 can1-100 + pRS416/ORC4 + pRS415/orc4T482I</i>                                              | This study |
| <b>YB 1571</b> | <i>MAT<math>\alpha</math> orc4::TRP1 ade2-1 ura3-1 his 3-11, 15 trp1-1 leu2-3,112 can1-100 + pRS416/ORC4 + pRS415/orc4T482D</i>                                              | This study |
| <b>YB 1562</b> | <i>MAT<math>\alpha</math> orc4::TRP1 ade2-1 ura3-1 his 3-11, 15 trp1-1 leu2-3,112 can1-100 + pRS416/ORC4 + pRS415/orc4R478K</i>                                              | This study |
| <b>YB 1563</b> | <i>MAT<math>\alpha</math> orc4::TRP1 ade2-1 ura3-1 his 3-11, 15 trp1-1 leu2-3,112 can1-100 + pRS416/ORC4 + pRS415/orc4F485A, Y486A</i>                                       | This study |
| <b>YB 1564</b> | <i>MAT<math>\alpha</math> orc4::TRP1 ade2-1 ura3-1 his 3-11, 15 trp1-1 leu2-3,112 can1-100 + pRS416/ORC4 + pRS415/orc4F485Y, Y486F</i>                                       | This study |
| <b>YB1635</b>  | <i>MAT<math>\alpha</math> orc4::TRP1 ade2-1 ura3-1 his 3-11, 15 trp1-1 leu2-3,112 can1-100 + pRS416/ORC4 + pRS415/orc4F485I, Y486Q</i>                                       | This study |
| <b>YKC01</b>   | <i>MAT<math>\alpha</math> orc4::TRP1 ade2-1 ura3-1 his 3-11, 15 trp1-1 leu2-3,112 can1-100 + pRS416/ORC4 + pRS415/orc4F492L</i>                                              | This study |
| <b>YKC02</b>   | <i>MAT<math>\alpha</math> orc4::TRP1 ade2-1 ura3-1 his 3-11, 15 trp1-1 leu2-3,112 can1-100 + pRS416/ORC4 + pRS415/orc4Y490L</i>                                              | This study |
| <b>YKC03</b>   | <i>MAT<math>\alpha</math> orc4::TRP1 ade2-1 ura3-1 his 3-11, 15 trp1-1 leu2-3,112 can1-100 + pRS416/ORC4 + pRS415/orc4Y490R</i>                                              | This study |
| <b>YKC04</b>   | <i>MAT<math>\alpha</math> orc4::TRP1 ade2-1 ura3-1 his 3-11, 15 trp1-1 leu2-3,112 can1-100 + pRS416/ORC4 + pRS415/orc4F492S</i>                                              | This study |
| <b>YB1637</b>  | <i>MAT<math>\alpha</math> orc4::TRP1 ade2-1 ura3-1 his 3-11, 15 trp1-1 leu2-3,112 can1-100 + pRS416/ORC4 + pRS415/orc4R227D</i>                                              | This study |
| <b>YEH003</b>  | <i>MAT<math>\alpha</math> orc4::TRP1 ade2-1 ura3-1 his 3-11, 15 trp1-1 leu2-3,112 can1-100 + pRS416/ORC4 + pRS415/orc4V226A</i>                                              | This study |
| <b>YEH004</b>  | <i>MAT<math>\alpha</math> orc4::TRP1 ade2-1 ura3-1 his 3-11, 15 trp1-1 leu2-3,112 can1-100 + pRS416/ORC4 + pRS415/orc4V226R</i>                                              | This study |
| <b>YEH005</b>  | <i>MAT<math>\alpha</math> orc4::TRP1 ade2-1 ura3-1 his 3-11, 15 trp1-1 leu2-3,112 can1-100 + pRS416/ORC4 + pRS415/orc4R227A</i>                                              | This study |
| <b>YEH002</b>  | <i>MAT<math>\alpha</math> orc4::TRP1 ade2-1 ura3-1 his 3-11, 15 trp1-1 leu2-3,112 can1-100 + pRS416/ORC4 + pRS415/orc4Q493R</i>                                              | This study |
| <b>YEH001</b>  | <i>MAT<math>\alpha</math> orc4::TRP1 ade2-1 ura3-1 his 3-11, 15 trp1-1 leu2-3,112 can1-100 + pRS416/ORC4 + pRS415/orc4D479R</i>                                              | This study |
| <b>YS2251</b>  | <i>MAT<math>\alpha</math> bar1<math>\Delta</math>::TRP1 ade2-1 ura3-1 his3-11, 15 trp1-1 leu2-3,112 can1-100</i>                                                             |            |
| <b>YB 1549</b> | <i>MAT<math>\alpha</math> bar1<math>\Delta</math>::TRP1 LEU2::BrdU-Inc ade2-1 ura3-1 his3-11, 15 trp1-1 leu2-3,112 can1-100</i>                                              | This study |
| <b>YB1588</b>  | <i>MAT<math>\alpha</math> orc4::TRP1 bar1<math>\Delta</math>::TRP1 LEU2::BrdU-Inc ade2-1 ura3-1 his3-11, 15 trp1-1 leu2-3,112 can1-100 + pRS416/ORC4</i>                     | This study |
| <b>YB 1623</b> | <i>MAT<math>\alpha</math> his3::TAP-ORC4 orc4::TRP1 bar1<math>\Delta</math>::TRP1 LEU2::BrdU-Inc ade2-1 ura3-1 his3-11, 15 trp1-1 leu2-3,112 can1-100 + pRS416/ORC4</i>      | This study |
| <b>YB 1624</b> | <i>MAT<math>\alpha</math> his3::TAP-orc4F485I orc4::TRP1 bar1<math>\Delta</math>::TRP1 LEU2::BrdU-Inc ade2-1 ura3-1 his3-11, 15 trp1-1 leu2-3,112 can1-100 + pRS416/ORC4</i> | This study |

|                |                                                                                                                                                |            |
|----------------|------------------------------------------------------------------------------------------------------------------------------------------------|------------|
| <b>YB 1625</b> | <i>MATa his3::TAP-orc4N489A orc4::TRP1 bar1Δ::TRP1 LEU2::BrdU-Inc ade2-1 ura3-1 his3-11, 15 trp1-1 leu2-3,112 can1-100 + pRS416/ORC4</i>       | This study |
| <b>YB 1630</b> | <i>MATa his3::TAP-orc4KLaH orc4::TRP1 bar1Δ::TRP1 LEU2::BrdU-Inc ade2-1 ura3-1 his3-11, 15 trp1-1 leu2-3,112 can1-100 + pRS416/ORC4</i>        | This study |
| <b>YB 1631</b> | <i>MATa his3::TAP-orc4F485Y+Y486F orc4::TRP1 bar1Δ::TRP1 LEU2::BrdU-Inc ade2-1 ura3-1 his3-11, 15 trp1-1 leu2-3,112 can1-100 + pRS416/ORC4</i> | This study |
| <b>YB 1632</b> | <i>MATa his3::TAP-orc4R478K orc4::TRP1 bar1Δ::TRP1 LEU2::BrdU-Inc ade2-1 ura3-1 his3-11, 15 trp1-1 leu2-3,112 can1-100 + pRS416/ORC4</i>       | This study |
| <b>YB 1633</b> | <i>MATa his3::TAP-orc4ΔaH orc4::TRP1 bar1Δ::TRP1 LEU2::BrdU-Inc ade2-1 ura3-1 his3-11, 15 trp1-1 leu2-3,112 can1-100 + pRS416/ORC4</i>         | This study |
| <b>YB1647</b>  | <i>MATa his3::TAP-orc4N489W orc4::TRP1 bar1Δ::TRP1 LEU2::BrdU-Inc ade2-1 ura3-1 his3-11, 15 trp1-1 leu2-3,112 can1-100 + pRS416/ORC4</i>       | This study |
| <b>YB1648</b>  | <i>MATa his3::TAP-orc4R478A orc4::TRP1 bar1Δ::TRP1 LEU2::BrdU-Inc ade2-1 ura3-1 his3-11, 15 trp1-1 leu2-3,112 can1-100 + pRS416/ORC4</i>       | This study |
| <b>YB1652</b>  | <i>MATa his3::TAP-orc4Y486Q orc4::TRP1 bar1Δ::TRP1 LEU2::BrdU-Inc ade2-1 ura3-1 his3-11, 15 trp1-1 leu2-3,112 can1-100 + pRS416/ORC4</i>       | This study |
| <b>YB1653</b>  | <i>MATa his3::TAP-orc4F485A+Y486A orc4::TRP1 bar1Δ::TRP1 LEU2::BrdU-Inc ade2-1 ura3-1 his3-11, 15 trp1-1 leu2-3,112 can1-100 + pRS416/ORC4</i> | This study |
| <b>YB1654</b>  | <i>MATa his3::TAP-orc4F485I+Y486Q orc4::TRP1 bar1Δ::TRP1 LEU2::BrdU-Inc ade2-1 ura3-1 his3-11, 15 trp1-1 leu2-3,112 can1-100 + pRS416/ORC4</i> | This study |
| <b>YB1649</b>  | <i>MATa his3::TAP-ORC4 orc4::TRP1 bar1Δ::TRP1 LEU2::BrdU-Inc ade2-1 ura3-1 his3-11, 15 trp1-1 leu2-3,112 can1-100</i>                          | This study |
| <b>YB1650</b>  | <i>MATa his3::TAP-orc4F485I orc4::TRP1 bar1Δ::TRP1 LEU2::BrdU-Inc ade2-1 ura3-1 his3-11, 15 trp1-1 leu2-3,112 can1-100</i>                     | This study |
| <b>YB1655</b>  | <i>MATa his3::TAP-orc4N489A orc4::TRP1 bar1Δ::TRP1 LEU2::BrdU-Inc ade2-1 ura3-1 his3-11, 15 trp1-1 leu2-3,112 can1-100</i>                     | This study |
| <b>YB1656</b>  | <i>MATa his3::TAP-orc4F485Y+Y486F orc4::TRP1 bar1Δ::TRP1 LEU2::BrdU-Inc ade2-1 ura3-1 his3-11, 15 trp1-1 leu2-3,112 can1-100</i>               | This study |
| <b>YB1657</b>  | <i>MATa his3::TAP-orc4R478K orc4::TRP1 bar1Δ::TRP1 LEU2::BrdU-Inc ade2-1 ura3-1 his3-11, 15 trp1-1 leu2-3,112 can1-100</i>                     | This study |

|                |                                                                                                                                  |            |
|----------------|----------------------------------------------------------------------------------------------------------------------------------|------------|
| <b>YB1658</b>  | <i>MATa his3::TAP-orc4N489W orc4::TRP1 bar1Δ::TRP1 LEU2::BrdU-Inc ade2-1 ura3-1 his3-11, 15 trp1-1 leu2-3,112 can1-100</i>       | This study |
| <b>YB1659</b>  | <i>MATa his3::TAP-orc4R478A orc4::TRP1 bar1Δ::TRP1 LEU2::BrdU-Inc ade2-1 ura3-1 his3-11, 15 trp1-1 leu2-3,112 can1-100</i>       | This study |
| <b>YB1660</b>  | <i>MATa his3::TAP-orc4Y486Q orc4::TRP1 bar1Δ::TRP1 LEU2::BrdU-Inc ade2-1 ura3-1 his3-11, 15 trp1-1 leu2-3,112 can1-100</i>       | This study |
| <b>YB1661</b>  | <i>MATa his3::TAP-orc4F485A+Y486A orc4::TRP1 bar1Δ::TRP1 LEU2::BrdU-Inc ade2-1 ura3-1 his3-11, 15 trp1-1 leu2-3,112 can1-100</i> | This study |
| <b>YB1662</b>  | <i>MATa his3::TAP-orc4F485I+Y486Q orc4::TRP1 bar1Δ::TRP1 LEU2::BrdU-Inc ade2-1 ura3-1 his3-11, 15 trp1-1 leu2-3,112 can1-100</i> | This study |
| <b>YB 1620</b> | <i>MATα orc2::TRP1 ade2-1 ura3-1 his 3-11, 15 trp1-1 leu2-3,112 can1-100 + pRS316/ORC2 + pRS415</i>                              | This study |
| <b>YB 1619</b> | <i>MATα orc2::TRP1 ade2-1 ura3-1 his 3-11, 15 trp1-1 leu2-3,112 can1-100 + pRS316/ORC2 + pRS415/ORC2</i>                         | This study |
| <b>YB 1621</b> | <i>MATα orc2::TRP1 ade2-1 ura3-1 his 3-11, 15 trp1-1 leu2-3,112 can1-100 + pRS316/ORC2 + pRS415/orc2T393A</i>                    | This study |
| <b>YB 1611</b> | <i>MATα orc2::TRP1 ade2-1 ura3-1 his 3-11, 15 trp1-1 leu2-3,112 can1-100 + pRS316/ORC2 + pRS415/orc2W396A</i>                    | This study |
| <b>YKC05</b>   | <i>MATα orc2::TRP1 ade2-1 ura3-1 his 3-11, 15 trp1-1 leu2-3,112 can1-100 + pRS316/ORC2 + pRS415/orc2K394A</i>                    | This study |
| <b>YKC06</b>   | <i>MATα orc2::TRP1 ade2-1 ura3-1 his 3-11, 15 trp1-1 leu2-3,112 can1-100 + pRS316/ORC2 + pRS415/orc2Y395A</i>                    | This study |
| <b>YKC07</b>   | <i>MATα orc2::TRP1 ade2-1 ura3-1 his 3-11, 15 trp1-1 leu2-3,112 can1-100 + pRS316/ORC2 + pRS415/orc2N398A</i>                    | This study |
| <b>YKC08</b>   | <i>MATα orc2::TRP1 ade2-1 ura3-1 his 3-11, 15 trp1-1 leu2-3,112 can1-100 + pRS316/ORC2 + pRS415/orc2Δ393-398</i>                 | This study |
| <b>YKC09</b>   | <i>MATα orc2::TRP1 ade2-1 ura3-1 his 3-11, 15 trp1-1 leu2-3,112 can1-100 + pRS316/ORC2 + pRS415/orc2Δ390-398</i>                 | This study |

**Supplementary Methods Table 1 | Genotype and resources of yeast strains used in this study**

| <b>Primer Names</b> | <b>Primer Sequence</b>                      | <b>Note</b>               |
|---------------------|---------------------------------------------|---------------------------|
| <b>YEH001</b>       | GCGACCGCAGCATTTCaaGCTAGCAATTATCAATTCAGGG    | Used for Orc4 mutagenesis |
| <b>YEH002</b>       | CCCTGAAATTGATAATTGCTAGCttgAAATGCTGCGGTCGC   | Used for Orc4 mutagenesis |
| <b>YEH003</b>       | CGACCGCAGCATTTCgcGCTAGCAATTATCAATTCAG       | Used for Orc4 mutagenesis |
| <b>YEH004</b>       | CTGAAATTGATAATTGCTAGCggcAAATGCTGCGGTCGC     | Used for Orc4 mutagenesis |
| <b>YEH005</b>       | CGACCGCAGCAattTACGCTAGCAATTATCAATTCAGGG     | Used for Orc4 mutagenesis |
| <b>YEH006</b>       | CCCTGAAATTGATAATTGCTAGCGTAaatTGCTGCGGTCG    | Used for Orc4 mutagenesis |
| <b>YEH007</b>       | CGACCGCAGCAgctTACGCTAGCAATTATCAATTCAGGG     | Used for Orc4 mutagenesis |
| <b>YEH008</b>       | CCCTGAAATTGATAATTGCTAGCGTAagcTGCTGCGGTCG    | Used for Orc4 mutagenesis |
| <b>YEH009</b>       | CGACCGCAGCATTTCGCTAGCgctTATCAATTCAGGG       | Used for Orc4 mutagenesis |
| <b>YEH010</b>       | CCTGAAATTGATAagcGCTAGCGTAAAATGCTGCGGTCGC    | Used for Orc4 mutagenesis |
| <b>YEH011</b>       | GCATTTTACGCTAGCtggTATCAATTCAGGGCACCATGATCCG | Used for Orc4 mutagenesis |

|               |                                                                                        |                                     |
|---------------|----------------------------------------------------------------------------------------|-------------------------------------|
| <b>YEH012</b> | CGGGATCATGGTGCCCTGAAATTGATAccaGCTAGCGTAAA<br>ATGC                                      | Used for<br>Orc4<br>mutagenesi<br>s |
| <b>YEH013</b> | ACCGCAGCATT TTTACGCTAGCAATTATCAA gctCAGGGCACC                                          | Used for<br>Orc4<br>mutagenesi<br>s |
| <b>YEH014</b> | GGTGCCCTGagcTTGATAATTGCTAGCGTAAAATGCTGCGGT                                             | Used for<br>Orc4<br>mutagenesi<br>s |
| <b>YEH015</b> | ACCGCAGCATT TTTACGCTAGCAATgctCAATTCAGGGC                                               | Used for<br>Orc4<br>mutagenesi<br>s |
| <b>YEH016</b> | GCCCTGAAATTGagcATTGCTAGCGTAAAATGCTGCGGT                                                | Used for<br>Orc4<br>mutagenesi<br>s |
| <b>YEH017</b> | CCGAGAAATCAGCCGTTGGTTTGgcaGATAATGCGAC                                                  | Used for<br>Orc4<br>mutagenesi<br>s |
| <b>YEH018</b> | GTCGCATTATCtgcCAAACCAACGGCTGATTTCTCGG                                                  | Used for<br>Orc4<br>mutagenesi<br>s |
| <b>YEH024</b> | CCGTTGGTTTGAGAGATAATGAAGACTCTGCTATAACAATCA<br>GCAAAC TACAATTCATCCGGCACCATGATCCCGTTTGAC | Used for<br>Orc4<br>mutagenesi<br>s |
| <b>YEH025</b> | GTCAAACGGGATCATGGTGCCGGATGAATTGTAGTTTGCTG<br>ATTGTATAGCAGAGTCTTCATTATCTCTCAAACCAACGG   | Used for<br>Orc4<br>mutagenesi<br>s |
| <b>YEH026</b> | GCCGTTGGTTTGAGAGATAATGGCACCATGATCCCGTTTGA<br>C                                         | Used for<br>Orc4<br>mutagenesi<br>s |
| <b>YEH027</b> | GTCAAACGGGATCATGGTGCCATTATCTCTCAAACCAACG<br>GC                                         | Used for<br>Orc4<br>mutagenesi<br>s |
| <b>YEH032</b> | GCATTTTACGCTAGCAATTATCAATTTgccGGCACCATGATC<br>CC                                       | Used for<br>Orc4                    |



|               |                                                   |                           |
|---------------|---------------------------------------------------|---------------------------|
|               |                                                   | mutagenesis               |
| <b>YEH033</b> | GGGATCATGGTGCCggcAAATTGATAATTGCTAGCGTAAATGC       | Used for Orc4 mutagenesis |
| <b>YEH034</b> | GCATTTTACGCTAGCAATTATCAATTTagaGGCACCATGATCCG      | Used for Orc4 mutagenesis |
| <b>YEH035</b> | CGGGATCATGGTGCCtctAAATTGATAATTGCTAGCGTAAATGC      | Used for Orc4 mutagenesis |
| <b>YEH036</b> | GGTTGCCTTAAGGGCGgccGACGGATCTTTTAATTTTAATTTAGC     | Used for Orc4 mutagenesis |
| <b>YEH037</b> | GCTAAATTAATAAATTAATAAAGATCCGTCggcCGCCCTTAAGGCAACC | Used for Orc4 mutagenesis |
| <b>YEH038</b> | GGTTGCCTTAAGGGCGgagGACGGATCTTTTAATTTTAATTTAGC     | Used for Orc4 mutagenesis |
| <b>YEH039</b> | GCTAAATTAATAAATTAATAAAGATCCGTCctcCGCCCTTAAGGCAACC | Used for Orc4 mutagenesis |
| <b>YEH040</b> | CGTTGGTTTGAGAGATAATGCGgCGCAGCATTTTACGCTAGC        | Used for Orc4 mutagenesis |
| <b>YEH041</b> | GCTAGCGTAAATGCTGCcgcCGCATTATCTCTCAAACCAACG        | Used for Orc4 mutagenesis |
| <b>YEH042</b> | CGTTGGTTTGAGAGATAATGCGcggGCAGCATTTTACGCTAGC       | Used for Orc4 mutagenesis |
| <b>YEH043</b> | GCTAGCGTAAATGCTGCcCGCATTATCTCTCAAACCAACG          | Used for Orc4 mutagenesis |

|              |                                                 |                           |
|--------------|-------------------------------------------------|---------------------------|
| <b>YE180</b> | CAGCAgctgccGCTAGCAATTATCAATTCAG                 | Used for Orc4 mutagenesis |
| <b>YE181</b> | CTGAAATTGATAATTGCTAGCggcagcTGCTG                | Used for Orc4 mutagenesis |
| <b>YE182</b> | CGACCGCAGCAattcaaGCTAGCAATTATCAATTCAG           | Used for Orc4 mutagenesis |
| <b>YE183</b> | CTGAAATTGATAATTGCTAGCttgaatTGCTGCGGTCG          | Used for Orc4 mutagenesis |
| <b>YE184</b> | CGACCGCAGCAactttGCTAGCAATTATCAATTCAG            | Used for Orc4 mutagenesis |
| <b>YE185</b> | CTGAAATTGATAATTGCTAGCaaagtaTGCTGCGGTCG          | Used for Orc4 mutagenesis |
| <b>YE186</b> | CCGAGAAATCAGCCGTTGGTTTGaaaGATAATGCGAC           | Used for Orc4 mutagenesis |
| <b>YE187</b> | GTCGCATTATCttCAAACCAACGGCTGATTCTCGG             | Used for Orc4 mutagenesis |
| <b>YE188</b> | CGTTGGTTTGAGAGATAATGCGattGCAGCATTTTACGCTAG<br>C | Used for Orc4 mutagenesis |
| <b>YE189</b> | GCTAGCGTAAAATGCTGCaatCGCATTATCTCTCAAACCAAC<br>G | Used for Orc4 mutagenesis |
| <b>YE190</b> | CGTTGGTTTGAGAGATAATGCGgatGCAGCATTTTACGCTAG<br>C | Used for Orc4 mutagenesis |
| <b>YE191</b> | GCTAGCGTAAAATGCTGCatcCGCATTATCTCTCAAACCAAC<br>G | Used for Orc4             |

|              |                                           |                           |
|--------------|-------------------------------------------|---------------------------|
|              |                                           | mutagenesis               |
| <b>YE235</b> | ACATTTGCTGGGCCTgccAGGCAAACCTTTATTATACAATC | Used for Orc4 mutagenesis |
| <b>YE236</b> | GATTGTATAATAAAGTTTGCCTggcAGGCCAGCAAATGT   | Used for Orc4 mutagenesis |
| <b>YE237</b> | ACATTTGCTGGGCCTcgcAGGCAAACCTTTATTATACAATC | Used for Orc4 mutagenesis |
| <b>YE238</b> | GATTGTATAATAAAGTTTGCCTgcgAGGCCAGCAAATGT   | Used for Orc4 mutagenesis |
| <b>YE239</b> | ACATTTGCTGGGCCTGTGgccCAAACCTTTATTATACAATC | Used for Orc4 mutagenesis |
| <b>YE240</b> | GATTGTATAATAAAGTTTggcCACAGGCCAGCAAATGT    | Used for Orc4 mutagenesis |
| <b>YE241</b> | ACATTTGCTGGGCCTGTGgacCAAACCTTTATTATACAATC | Used for Orc4 mutagenesis |
| <b>YE242</b> | GATTGTATAATAAAGTTTgtcCACAGGCCAGCAAATGT    | Used for Orc4 mutagenesis |
| <b>YE304</b> | CCGAGAAATCAGCCGTTGGTTTGAGAagaAATGCGAC     | Used for Orc4 mutagenesis |
| <b>YE305</b> | GTCGCATTtctTCTCAAACCAACGGCTGATTCTCGG      | Used for Orc4 mutagenesis |
| <b>YE352</b> | CCGCAGCATTTTACGCTAGCAATttgCAATTCAGGGCACC  | Used for Orc4 mutagenesis |

|               |                                                                      |                           |
|---------------|----------------------------------------------------------------------|---------------------------|
| <b>YEH353</b> | GGTGCCCTGAAATTG <sup>caa</sup> ATTGCTAGCGTAAAATGCTGCGG               | Used for Orc4 mutagenesis |
| <b>YEH354</b> | CCGCAGCATT <sup>TTT</sup> TACGCTAGCAAT <sup>aga</sup> CAATTCAGGGCACC | Used for Orc4 mutagenesis |
| <b>YEH355</b> | GGTGCCCTGAAATTG <sup>tct</sup> ATTGCTAGCGTAAAATGCTGCGG               | Used for Orc4 mutagenesis |
| <b>YEH356</b> | CGCTAGCAATTATCA <sup>acta</sup> CAGGGCACCATGATCCCG                   | Used for Orc4 mutagenesis |
| <b>YEH357</b> | CGGGATCATGGTGCCCTG <sup>tag</sup> TTGATAATTGCTAGCG                   | Used for Orc4 mutagenesis |
| <b>YEH358</b> | CGCTAGCAATTATCA <sup>atca</sup> CAGGGCACCATGATCCCG                   | Used for Orc4 mutagenesis |
| <b>YEH359</b> | CGGGATCATGGTGCCCTG <sup>tga</sup> TTGATAATTGCTAGCG                   | Used for Orc4 mutagenesis |
| <b>YEH192</b> | GACAAGAAGCGAA <sup>gcc</sup> AAGTACTGGGGCAATCATGTG                   | Used for Orc2 mutagenesis |
| <b>YEH193</b> | CACATGATTGCCCCAGTACTT <sup>ggc</sup> TTCGCTTCTTGTC                   | Used for Orc2 mutagenesis |
| <b>YEH194</b> | GACAAGAAGCGAA <sup>act</sup> gctTACTGGGGCAATCATGTG                   | Used for Orc2 mutagenesis |
| <b>YEH195</b> | CACATGATTGCCCCAGTA <sup>agc</sup> AGTTTCGCTTCTTGTC                   | Used for Orc2 mutagenesis |
| <b>YEH196</b> | GACAAGAAGCGAA <sup>actaag</sup> gctTGGGGCAATCATGTG                   | Used for Orc2             |

|               |                                          |                           |
|---------------|------------------------------------------|---------------------------|
|               |                                          | mutagenesis               |
| <b>YEH197</b> | CACATGATTGCCCCAagcCTTAGTTTCGCTTCTTGTC    | Used for Orc2 mutagenesis |
| <b>YEH198</b> | GACAAGAAGCGAAACTAAGTACgctGGCAATCATGTG    | Used for Orc2 mutagenesis |
| <b>YEH199</b> | CACATGATTGCCagcGTACTTAGTTTCGCTTCTTGTC    | Used for Orc2 mutagenesis |
| <b>YEH200</b> | ACTAAGTACTGGGGCgctCATGTGATTTTGCAGA       | Used for Orc2 mutagenesis |
| <b>YEH201</b> | TCTGCAAATCACATGagcGCCCCAGTACTTAGT        | Used for Orc2 mutagenesis |
| <b>YEH326</b> | CTGAGTTGACAAGAAGCGAACATGTGATTTTGCAGATCCA | Used for Orc2 mutagenesis |
| <b>YEH327</b> | TGGATCTGCAAATCACATGTTCGCTTCTTGTCAACTCAG  | Used for Orc2 mutagenesis |
| <b>YEH328</b> | TGGTCCCCGCTGAGTTGACACATGTGATTTTGCAGATCCA | Used for Orc2 mutagenesis |
| <b>YEH329</b> | TGGATCTGCAAATCACATGTGTCAACTCAGCGGGGACCA  | Used for Orc2 mutagenesis |
| <b>YEH019</b> | ATGACTATAAGCGAAGCTCG                     | Used for Orc4 sequencing  |

|                  |                           |                                                           |
|------------------|---------------------------|-----------------------------------------------------------|
| <b>YEH020</b>    | CTCAATTGGAACAGCAGTTG      | Used for Orc4 sequencing /integrated NTAP-Orc4 sequencing |
| <b>YEH021</b>    | AAGAGTGATTTATATGCCGC      | Used for Orc4 sequencing /integrated NTAP-Orc4 sequencing |
| <b>YEH022</b>    | TCAACTCCAGAATTCCCAC       | Used for Orc4 sequencing /integrated NTAP-Orc4 sequencing |
| <b>YEH023</b>    | TCACAGTTGTGTCCAGGAG       | Used for Orc4 sequencing                                  |
| <b>YEH221</b>    | GGAAGACTTTGTAGAGCAT       | Used for Orc2 sequencing                                  |
| <b>YEH222</b>    | CCTACACGTATGCGGAA         | Used for Orc2 sequencing                                  |
| <b>YEH223</b>    | ATGCTCTACAAAGTCTTCC       | Used for Orc2 sequencing                                  |
| <b>YEH224</b>    | TTCCGCATACGTGTAGG         | Used for Orc2 sequencing                                  |
| <b>gYEH003-F</b> | ATTTGTAATACGCTTTACTAGTTTT | Used for gRNA003 insertion to bRA89 plasmid               |

|                       |                           |                                                                                                               |
|-----------------------|---------------------------|---------------------------------------------------------------------------------------------------------------|
| <b>gYEH00<br/>3-R</b> | TAGTAAAGCGTATTACAAATGATCA | Used for<br>gRNA003<br>insertion to<br>bRA89<br>plasmid                                                       |
| <b>gYEH00<br/>5-F</b> | GAATATACTAAAAAATGAGCGTTTT | Used for<br>gRNA005<br>insertion to<br>bRA89<br>plasmid                                                       |
| <b>gYEH00<br/>5-R</b> | GCTCATTTTTTAGTATATTCGATCA | Used for<br>gRNA005<br>insertion to<br>bRA89<br>plasmid                                                       |
| <b>YEH263</b>         | AGAAGAAGCATGGCAGGCCTTG    | Used for<br>CRISPR<br>NTAP-<br>Orc4<br>template<br>construction/<br>integrated<br>NTAP-<br>Orc4<br>sequencing |
| <b>YEH264</b>         | accagcaccTAGGGCGAATTG     | Used for<br>CRISPR<br>NTAP-<br>Orc4<br>template<br>construction                                               |
| <b>YEH265</b>         | CTAggtgctggtATGACTATAAG   | Used for<br>CRISPR<br>NTAP-<br>Orc4<br>template<br>construction                                               |

|               |                                          |                                                                                 |
|---------------|------------------------------------------|---------------------------------------------------------------------------------|
| <b>YEH266</b> | TTTTTCAACGCTAACTATAATTT                  | Used for CRISPR NTAP-Orc4 template construction/integrated NTAP-Orc4 sequencing |
| <b>YEH267</b> | CTCGAGGCCACCAAGAAGAGAAAGAGAAGAGC         | Used for CRISPR NTAP-Orc4 template construction                                 |
| <b>YEH268</b> | AGGCCTGCCATGCTTCTTCTTTTGAATATTACCGATATT  | Used for CRISPR NTAP-Orc4 template construction                                 |
| <b>YEH311</b> | TTCCTGCAGCCCGGGGGATCGAAGAGAAAGAGAAGAGCCA | Used for CRISPR NTAP-Orc4 template construction                                 |
| <b>YEH312</b> | GCTCCACCGCGGTGGCGGCCTTTTTCAACGCTAACTATAA | Used for CRISPR NTAP-Orc4 template construction                                 |



|                      |                                                                                          |                                                                                                                   |
|----------------------|------------------------------------------------------------------------------------------|-------------------------------------------------------------------------------------------------------------------|
| <b>ssYEH0<br/>01</b> | AATGAGCAGGCAAGATAAACGAAGGCAAAGATGACAGAG<br>CAGAAAGCCCGAAGAGAAAGAGAAGAGCCAGATATTGAC<br>TG | Used for<br>CRIPSR<br>NTAP-<br>Orc4<br>integration<br>yeast<br>transforma<br>tion<br>(coupled<br>with<br>gRNA003) |
| <b>ssYEH0<br/>02</b> | ACAAGTGGCAATGAAAAAAATTATAGTTAGCGTTGAAAAA<br>TgcgAAAGCGTATTACAAATGAAACCAAGATTCAGATTGC     | Used for<br>CRIPSR<br>NTAP-<br>Orc4<br>integration<br>yeast<br>transforma<br>tion<br>(coupled<br>with<br>gRNA003) |
| <b>ssYEH0<br/>03</b> | TTATACATTATATAAAGTAATGTGATTTCTTCGAAGAATAT<br>ACTAAAAAGAAGAGAAAGAGAAGAGCCAGATATTGACTG     | Used for<br>CRIPSR<br>NTAP-<br>Orc4<br>integration<br>yeast<br>transforma<br>tion<br>(coupled<br>with<br>gRNA005) |
| <b>ssYEH0<br/>04</b> | ACAAGTGGCAATGAAAAAAATTATAGTTAGCGTTGAAAAA<br>ATatcCAGGCAAGATAAACGAAGGCAAAGATGACAGAGCA     | Used for<br>CRIPSR<br>NTAP-<br>Orc4<br>integration<br>yeast<br>transforma<br>tion<br>(coupled<br>with<br>gRNA005) |

|                         |                                                              |                                                                           |
|-------------------------|--------------------------------------------------------------|---------------------------------------------------------------------------|
| <b>YEH298</b>           | TTAAGAGCTTGGTGAGCGCT                                         | Used for<br>CRISPR<br>NTAP-<br>Orc4<br>insertion<br>checking              |
| <b>YEH299</b>           | ATGCTTGGCAGAGCATGTAT                                         | Used for<br>CRISPR<br>NTAP-<br>Orc4<br>insertion<br>checking              |
| <b>YEH173</b>           | GTGCCCCGGAGGATGAGA                                           | Used for<br>integrated<br>NTAP-<br>Orc4<br>sequencing                     |
| <b>YEH279</b>           | TCACCATCTTCAACAGTCAA                                         | Used for<br>integrated<br>NTAP-<br>Orc4<br>sequencing                     |
| <b>YEH281</b>           | CGCGAATTGTGATATACCTA                                         | Used for<br>integrated<br>NTAP-<br>Orc4<br>sequencing                     |
| <b>YEH282</b>           | ATATGAGTGATAATGGTTCC                                         | Used for<br>integrated<br>NTAP-<br>Orc4<br>sequencing                     |
| <b>YEH294</b>           | GAAGAGAAAGAGAAGAGCCA                                         | Used for<br>integrated<br>NTAP-<br>Orc4<br>sequencing                     |
| <b>ARS416<br/>L1 AR</b> | CTCGGCATTCTGCTGAACCGCTCTTCCGATCT<br>CAAATGATTTAGCATTATCTTTAC | Used for<br>MPOS<br>assay<br>ARS416<br>sequencing<br>library<br>barcoding |

|                               |                                                                |                                                                           |
|-------------------------------|----------------------------------------------------------------|---------------------------------------------------------------------------|
| <b>ARS317<br/>L1 AR</b>       | CTCGGCATTCTGCTGAACCGCTCTTCCGATCT<br>TTTTATGGAAGATTAAGCTCA      | Used for<br>MPOS<br>assay<br>ARS317<br>sequencing<br>library<br>barcoding |
| <b>ARS416<br/>L1<br/>AF01</b> | ACTCTTTCCCTACACGACGCTCTTCCGATCT ACAT<br>AGACAAATGGTGTA AAAAGAC | Used for<br>MPOS<br>assay<br>ARS416<br>sequencing<br>library<br>barcoding |
| <b>ARS416<br/>L1<br/>AF02</b> | ACTCTTTCCCTACACGACGCTCTTCCGATCT AGCC<br>AGACAAATGGTGTA AAAAGAC | Used for<br>MPOS<br>assay<br>ARS416<br>sequencing<br>library<br>barcoding |
| <b>ARS416<br/>L1<br/>AF03</b> | ACTCTTTCCCTACACGACGCTCTTCCGATCT ATGT<br>AGACAAATGGTGTA AAAAGAC | Used for<br>MPOS<br>assay<br>ARS416<br>sequencing<br>library<br>barcoding |
| <b>ARS416<br/>L1<br/>AF04</b> | ACTCTTTCCCTACACGACGCTCTTCCGATCT CATA<br>AGACAAATGGTGTA AAAAGAC | Used for<br>MPOS<br>assay<br>ARS416<br>sequencing<br>library<br>barcoding |
| <b>ARS416<br/>L1<br/>AF05</b> | ACTCTTTCCCTACACGACGCTCTTCCGATCT CGAT<br>AGACAAATGGTGTA AAAAGAC | Used for<br>MPOS<br>assay<br>ARS416<br>sequencing<br>library<br>barcoding |

|                               |                                                                |                                                                           |
|-------------------------------|----------------------------------------------------------------|---------------------------------------------------------------------------|
| <b>ARS416<br/>L1<br/>AF06</b> | ACTCTTTCCCTACACGACGCTCTTCCGATCT CTCT<br>AGACAAATGGTGTA AAAAGAC | Used for<br>MPOS<br>assay<br>ARS416<br>sequencing<br>library<br>barcoding |
| <b>ARS416<br/>L1<br/>AF07</b> | ACTCTTTCCCTACACGACGCTCTTCCGATCT GAGA<br>AGACAAATGGTGTA AAAAGAC | Used for<br>MPOS<br>assay<br>ARS416<br>sequencing<br>library<br>barcoding |
| <b>ARS416<br/>L1<br/>AF08</b> | ACTCTTTCCCTACACGACGCTCTTCCGATCT GCTA<br>AGACAAATGGTGTA AAAAGAC | Used for<br>MPOS<br>assay<br>ARS416<br>sequencing<br>library<br>barcoding |
| <b>ARS416<br/>L1<br/>AF09</b> | ACTCTTTCCCTACACGACGCTCTTCCGATCT GTAT<br>AGACAAATGGTGTA AAAAGAC | Used for<br>MPOS<br>assay<br>ARS416<br>sequencing<br>library<br>barcoding |
| <b>ARS416<br/>L1<br/>AF10</b> | ACTCTTTCCCTACACGACGCTCTTCCGATCT TACA<br>AGACAAATGGTGTA AAAAGAC | Used for<br>MPOS<br>assay<br>ARS416<br>sequencing<br>library<br>barcoding |
| <b>ARS416<br/>L1<br/>AF11</b> | ACTCTTTCCCTACACGACGCTCTTCCGATCT TCGG<br>AGACAAATGGTGTA AAAAGAC | Used for<br>MPOS<br>assay<br>ARS416<br>sequencing<br>library<br>barcoding |

|                               |                                                                |                                                                           |
|-------------------------------|----------------------------------------------------------------|---------------------------------------------------------------------------|
| <b>ARS416<br/>L1<br/>AF12</b> | ACTCTTTCCCTACACGACGCTCTTCCGATCT TGTA<br>AGACAAATGGTGTA AAAAGAC | Used for<br>MPOS<br>assay<br>ARS416<br>sequencing<br>library<br>barcoding |
| <b>ARS416<br/>L1<br/>AF13</b> | ACTCTTTCCCTACACGACGCTCTTCCGATCT AAAA<br>AGACAAATGGTGTA AAAAGAC | Used for<br>MPOS<br>assay<br>ARS416<br>sequencing<br>library<br>barcoding |
| <b>ARS416<br/>L1<br/>AF14</b> | ACTCTTTCCCTACACGACGCTCTTCCGATCT ACCA<br>AGACAAATGGTGTA AAAAGAC | Used for<br>MPOS<br>assay<br>ARS416<br>sequencing<br>library<br>barcoding |
| <b>ARS416<br/>L1<br/>AF15</b> | ACTCTTTCCCTACACGACGCTCTTCCGATCT AGGA<br>AGACAAATGGTGTA AAAAGAC | Used for<br>MPOS<br>assay<br>ARS416<br>sequencing<br>library<br>barcoding |
| <b>ARS416<br/>L1<br/>AF16</b> | ACTCTTTCCCTACACGACGCTCTTCCGATCT ATTA<br>AGACAAATGGTGTA AAAAGAC | Used for<br>MPOS<br>assay<br>ARS416<br>sequencing<br>library<br>barcoding |
| <b>ARS416<br/>L1<br/>AF17</b> | ACTCTTTCCCTACACGACGCTCTTCCGATCT CCAG<br>AGACAAATGGTGTA AAAAGAC | Used for<br>MPOS<br>assay<br>ARS416<br>sequencing<br>library<br>barcoding |

|                               |                                                                |                                                                           |
|-------------------------------|----------------------------------------------------------------|---------------------------------------------------------------------------|
| <b>ARS416<br/>L1<br/>AF18</b> | ACTCTTTCCCTACACGACGCTCTTCCGATCT CGCA<br>AGACAAATGGTGTA AAAAGAC | Used for<br>MPOS<br>assay<br>ARS416<br>sequencing<br>library<br>barcoding |
| <b>ARS416<br/>L1<br/>AF19</b> | ACTCTTTCCCTACACGACGCTCTTCCGATCT CTGG<br>AGACAAATGGTGTA AAAAGAC | Used for<br>MPOS<br>assay<br>ARS416<br>sequencing<br>library<br>barcoding |
| <b>ARS416<br/>L1<br/>AF20</b> | ACTCTTTCCCTACACGACGCTCTTCCGATCT GATT<br>AGACAAATGGTGTA AAAAGAC | Used for<br>MPOS<br>assay<br>ARS416<br>sequencing<br>library<br>barcoding |
| <b>ARS416<br/>L1<br/>AF21</b> | ACTCTTTCCCTACACGACGCTCTTCCGATCT GGAA<br>AGACAAATGGTGTA AAAAGAC | Used for<br>MPOS<br>assay<br>ARS416<br>sequencing<br>library<br>barcoding |
| <b>ARS416<br/>L1<br/>AF22</b> | ACTCTTTCCCTACACGACGCTCTTCCGATCT GTCA<br>AGACAAATGGTGTA AAAAGAC | Used for<br>MPOS<br>assay<br>ARS416<br>sequencing<br>library<br>barcoding |
| <b>ARS416<br/>L1<br/>AF23</b> | ACTCTTTCCCTACACGACGCTCTTCCGATCT TAGC<br>AGACAAATGGTGTA AAAAGAC | Used for<br>MPOS<br>assay<br>ARS416<br>sequencing<br>library<br>barcoding |

|                               |                                                                  |                                                                           |
|-------------------------------|------------------------------------------------------------------|---------------------------------------------------------------------------|
| <b>ARS416<br/>L1<br/>AF24</b> | ACTCTTTCCCTACACGACGCTCTTCCGATCT TCTC<br>AGACAAATGGTGTAAGAC       | Used for<br>MPOS<br>assay<br>ARS416<br>sequencing<br>library<br>barcoding |
| <b>ARS317<br/>L1<br/>AF01</b> | ACTCTTTCCCTACACGACGCTCTTCCGATCT ACAT<br>CAGTGTTTTCAATTTTTTATTAAC | Used for<br>MPOS<br>assay<br>ARS317<br>sequencing<br>library<br>barcoding |
| <b>ARS317<br/>L1<br/>AF02</b> | ACTCTTTCCCTACACGACGCTCTTCCGATCT AGCC<br>CAGTGTTTTCAATTTTTTATTAAC | Used for<br>MPOS<br>assay<br>ARS317<br>sequencing<br>library<br>barcoding |
| <b>ARS317<br/>L1<br/>AF03</b> | ACTCTTTCCCTACACGACGCTCTTCCGATCT ATGT<br>CAGTGTTTTCAATTTTTTATTAAC | Used for<br>MPOS<br>assay<br>ARS317<br>sequencing<br>library<br>barcoding |
| <b>ARS317<br/>L1<br/>AF04</b> | ACTCTTTCCCTACACGACGCTCTTCCGATCT CATA<br>CAGTGTTTTCAATTTTTTATTAAC | Used for<br>MPOS<br>assay<br>ARS317<br>sequencing<br>library<br>barcoding |
| <b>ARS317<br/>L1<br/>AF05</b> | ACTCTTTCCCTACACGACGCTCTTCCGATCT CGAT<br>CAGTGTTTTCAATTTTTTATTAAC | Used for<br>MPOS<br>assay<br>ARS317<br>sequencing<br>library<br>barcoding |

|                               |                                                                    |                                                                           |
|-------------------------------|--------------------------------------------------------------------|---------------------------------------------------------------------------|
| <b>ARS317<br/>L1<br/>AF06</b> | ACTCTTTCCCTACACGACGCTCTTCCGATCT CTCT<br>CAGTGTTTTCAATTTTTTATTA AAC | Used for<br>MPOS<br>assay<br>ARS317<br>sequencing<br>library<br>barcoding |
| <b>ARS317<br/>L1<br/>AF07</b> | ACTCTTTCCCTACACGACGCTCTTCCGATCT GAGA<br>CAGTGTTTTCAATTTTTTATTA AAC | Used for<br>MPOS<br>assay<br>ARS317<br>sequencing<br>library<br>barcoding |
| <b>ARS317<br/>L1<br/>AF08</b> | ACTCTTTCCCTACACGACGCTCTTCCGATCT GCTA<br>CAGTGTTTTCAATTTTTTATTA AAC | Used for<br>MPOS<br>assay<br>ARS317<br>sequencing<br>library<br>barcoding |
| <b>ARS317<br/>L1<br/>AF09</b> | ACTCTTTCCCTACACGACGCTCTTCCGATCT GTAT<br>CAGTGTTTTCAATTTTTTATTA AAC | Used for<br>MPOS<br>assay<br>ARS317<br>sequencing<br>library<br>barcoding |
| <b>ARS317<br/>L1<br/>AF10</b> | ACTCTTTCCCTACACGACGCTCTTCCGATCT TACA<br>CAGTGTTTTCAATTTTTTATTA AAC | Used for<br>MPOS<br>assay<br>ARS317<br>sequencing<br>library<br>barcoding |
| <b>ARS317<br/>L1<br/>AF11</b> | ACTCTTTCCCTACACGACGCTCTTCCGATCT TCGG<br>CAGTGTTTTCAATTTTTTATTA AAC | Used for<br>MPOS<br>assay<br>ARS317<br>sequencing<br>library<br>barcoding |



|                               |                                                                    |                                                                           |
|-------------------------------|--------------------------------------------------------------------|---------------------------------------------------------------------------|
| <b>ARS317<br/>L1<br/>AF12</b> | ACTCTTTCCCTACACGACGCTCTTCCGATCT TGTA<br>CAGTGTTTTCAATTTTTTATTA AAC | Used for<br>MPOS<br>assay<br>ARS317<br>sequencing<br>library<br>barcoding |
| <b>ARS317<br/>L1<br/>AF13</b> | ACTCTTTCCCTACACGACGCTCTTCCGATCT AAAA<br>CAGTGTTTTCAATTTTTTATTA AAC | Used for<br>MPOS<br>assay<br>ARS317<br>sequencing<br>library<br>barcoding |
| <b>ARS317<br/>L1<br/>AF14</b> | ACTCTTTCCCTACACGACGCTCTTCCGATCT ACCA<br>CAGTGTTTTCAATTTTTTATTA AAC | Used for<br>MPOS<br>assay<br>ARS317<br>sequencing<br>library<br>barcoding |
| <b>ARS317<br/>L1<br/>AF15</b> | ACTCTTTCCCTACACGACGCTCTTCCGATCT AGGA<br>CAGTGTTTTCAATTTTTTATTA AAC | Used for<br>MPOS<br>assay<br>ARS317<br>sequencing<br>library<br>barcoding |
| <b>ARS317<br/>L1<br/>AF16</b> | ACTCTTTCCCTACACGACGCTCTTCCGATCT ATTA<br>CAGTGTTTTCAATTTTTTATTA AAC | Used for<br>MPOS<br>assay<br>ARS317<br>sequencing<br>library<br>barcoding |
| <b>ARS317<br/>L1<br/>AF17</b> | ACTCTTTCCCTACACGACGCTCTTCCGATCT CCAG<br>CAGTGTTTTCAATTTTTTATTA AAC | Used for<br>MPOS<br>assay<br>ARS317<br>sequencing<br>library<br>barcoding |

|                               |                                                                    |                                                                           |
|-------------------------------|--------------------------------------------------------------------|---------------------------------------------------------------------------|
| <b>ARS317<br/>L1<br/>AF18</b> | ACTCTTTCCCTACACGACGCTCTTCCGATCT CGCA<br>CAGTGTTTTCAATTTTTTATTA AAC | Used for<br>MPOS<br>assay<br>ARS317<br>sequencing<br>library<br>barcoding |
| <b>ARS317<br/>L1<br/>AF19</b> | ACTCTTTCCCTACACGACGCTCTTCCGATCT CTGG<br>CAGTGTTTTCAATTTTTTATTA AAC | Used for<br>MPOS<br>assay<br>ARS317<br>sequencing<br>library<br>barcoding |
| <b>ARS317<br/>L1<br/>AF20</b> | ACTCTTTCCCTACACGACGCTCTTCCGATCT GATT<br>CAGTGTTTTCAATTTTTTATTA AAC | Used for<br>MPOS<br>assay<br>ARS317<br>sequencing<br>library<br>barcoding |
| <b>ARS317<br/>L1<br/>AF21</b> | ACTCTTTCCCTACACGACGCTCTTCCGATCT GGAA<br>CAGTGTTTTCAATTTTTTATTA AAC | Used for<br>MPOS<br>assay<br>ARS317<br>sequencing<br>library<br>barcoding |
| <b>ARS317<br/>L1<br/>AF22</b> | ACTCTTTCCCTACACGACGCTCTTCCGATCT GTCA<br>CAGTGTTTTCAATTTTTTATTA AAC | Used for<br>MPOS<br>assay<br>ARS317<br>sequencing<br>library<br>barcoding |
| <b>ARS317<br/>L1<br/>AF23</b> | ACTCTTTCCCTACACGACGCTCTTCCGATCT TAGC<br>CAGTGTTTTCAATTTTTTATTA AAC | Used for<br>MPOS<br>assay<br>ARS317<br>sequencing<br>library<br>barcoding |

|                               |                                                                 |                                                                           |
|-------------------------------|-----------------------------------------------------------------|---------------------------------------------------------------------------|
| <b>ARS317<br/>L1<br/>AF24</b> | ACTCTTCCCTACACGACGCTCTTCCGATCT TCTC<br>CAGTGTTTTCAATTTTTTATTAAC | Used for<br>MPOS<br>assay<br>ARS317<br>sequencing<br>library<br>barcoding |
| <b>YEH229</b>                 | GCCGCAAAAAAGGGAATAAG                                            | Used for<br>MPOS<br>assay<br>sequencing<br>library<br>contrusctio<br>n    |
| <b>YEH230</b>                 | CGTGTTCAAACGATACCTGG                                            | Used for<br>MPOS<br>assay<br>sequencing<br>library<br>contrusctio<br>n    |
| <b>YEH231</b>                 | AATGATACGGCGACCACCGAGATCTACACTCTTCCCTACA<br>CG                  | Used for<br>MPOS<br>assay<br>sequencing<br>library<br>contrusctio<br>n    |
| <b>YEH232</b>                 | AAGCAGAAGACGGCATAACGAGATCGGTCTCGGCATTCCTG<br>CT                 | Used for<br>MPOS<br>assay<br>sequencing<br>library<br>contrusctio<br>n    |

**Supplementary Methods Table 2 | Primers and oligos sequences used in this study**
