# Supplementary material for: Evolution of DNA replication origin specification and gene silencing mechanisms
Source: PubMed Central journal article supplement (PMC7560902; doi:10.1038/s41467-020-18964-x), 2020-10-14
Supplement: 41467_2020_18964_MOESM5_ESM.pdf [file 41467_2020_18964_MOESM5_ESM.pdf]

## Reporting Summary

Nature Research wishes to improve the reproducibility of the work that we publish. This form provides structure for consistency and transparency in reporting. For further information on Nature Research policies, see our [Editorial Policies](#) and the [Editorial Policy Checklist](#).

### Statistics

For all statistical analyses, confirm that the following items are present in the figure legend, table legend, main text, or Methods section.

n/a Confirmed

- The exact sample size ( $n$ ) for each experimental group/condition, given as a discrete number and unit of measurement
- A statement on whether measurements were taken from distinct samples or whether the same sample was measured repeatedly
- The statistical test(s) used AND whether they are one- or two-sided  
*Only common tests should be described solely by name; describe more complex techniques in the Methods section.*
- A description of all covariates tested
- A description of any assumptions or corrections, such as tests of normality and adjustment for multiple comparisons
- A full description of the statistical parameters including central tendency (e.g. means) or other basic estimates (e.g. regression coefficient) AND variation (e.g. standard deviation) or associated estimates of uncertainty (e.g. confidence intervals)
- For null hypothesis testing, the test statistic (e.g.  $F$ ,  $t$ ,  $r$ ) with confidence intervals, effect sizes, degrees of freedom and  $P$  value noted  
*Give  $P$  values as exact values whenever suitable.*
- For Bayesian analysis, information on the choice of priors and Markov chain Monte Carlo settings
- For hierarchical and complex designs, identification of the appropriate level for tests and full reporting of outcomes
- Estimates of effect sizes (e.g. Cohen's  $d$ , Pearson's  $r$ ), indicating how they were calculated

*Our web collection on [statistics for biologists](#) contains articles on many of the points above.*

### Software and code

Policy information about [availability of computer code](#)

Data collection N/A

Data analysis Read mapping was performed using BWA and SAMtools. Other analyses were performed using Python scripts and Jupyter notebooks that are available at [https://github.com/jbkinney/17\\_ars](https://github.com/jbkinney/17_ars).

For manuscripts utilizing custom algorithms or software that are central to the research but not yet described in published literature, software must be made available to editors and reviewers. We strongly encourage code deposition in a community repository (e.g. GitHub). See the Nature Research [guidelines for submitting code & software](#) for further information.

### Data

Policy information about [availability of data](#)

All manuscripts must include a [data availability statement](#). This statement should provide the following information, where applicable:

- Accession codes, unique identifiers, or web links for publicly available datasets
- A list of figures that have associated raw data
- A description of any restrictions on data availability

Raw sequencing data has been deposited on the NCBI Sequence Read Archive under accession number PRJNA595459. No figures have associated raw data. All data reported in this publication is available at PRJNA595459, at [https://github.com/jbkinney/17\\_ars](https://github.com/jbkinney/17_ars), or from the authors upon request.

## Field-specific reporting

Please select the one below that is the best fit for your research. If you are not sure, read the appropriate sections before making your selection.

Life sciences       Behavioural & social sciences       Ecological, evolutionary & environmental sciences

For a reference copy of the document with all sections, see [nature.com/documents/nr-reporting-summary-flat.pdf](https://www.nature.com/documents/nr-reporting-summary-flat.pdf)

## Life sciences study design

All studies must disclose on these points even when the disclosure is negative.

|                 |           |
|-----------------|-----------|
| Sample size     | N/A       |
| Data exclusions | See text. |
| Replication     | See text. |
| Randomization   | N/A       |
| Blinding        | N/A       |

## Reporting for specific materials, systems and methods

We require information from authors about some types of materials, experimental systems and methods used in many studies. Here, indicate whether each material, system or method listed is relevant to your study. If you are not sure if a list item applies to your research, read the appropriate section before selecting a response.

### Materials & experimental systems

| n/a                                 | Involvement in the study                               |
|-------------------------------------|--------------------------------------------------------|
| <input type="checkbox"/>            | <input checked="" type="checkbox"/> Antibodies         |
| <input checked="" type="checkbox"/> | <input type="checkbox"/> Eukaryotic cell lines         |
| <input checked="" type="checkbox"/> | <input type="checkbox"/> Palaeontology and archaeology |
| <input checked="" type="checkbox"/> | <input type="checkbox"/> Animals and other organisms   |
| <input checked="" type="checkbox"/> | <input type="checkbox"/> Human research participants   |
| <input checked="" type="checkbox"/> | <input type="checkbox"/> Clinical data                 |
| <input checked="" type="checkbox"/> | <input type="checkbox"/> Dual use research of concern  |

### Methods

| n/a                                 | Involvement in the study                           |
|-------------------------------------|----------------------------------------------------|
| <input type="checkbox"/>            | <input checked="" type="checkbox"/> ChIP-seq       |
| <input type="checkbox"/>            | <input checked="" type="checkbox"/> Flow cytometry |
| <input checked="" type="checkbox"/> | <input type="checkbox"/> MRI-based neuroimaging    |

## Antibodies

|                 |                                                                                                                                                                                                                                              |
|-----------------|----------------------------------------------------------------------------------------------------------------------------------------------------------------------------------------------------------------------------------------------|
| Antibodies used | monoclonal antibodies directed against two ORC subunits, made in the Stillman laboratory. Orc4 (SB12) used at 1:2000 dilution and Orc1 (SB13) used at 1:1000 dilution. Also IgG Sepharose 6 Fast Flow beads (GE Healthcare, Cat# 17-0969-01) |
| Validation      | These antibodies have been used in many studies of yeast ORC since they were made in the early 1990s.                                                                                                                                        |

## ChIP-seq

### Data deposition

- Confirm that both raw and final processed data have been deposited in a public database such as [GEO](https://www.ncbi.nlm.nih.gov/geo/).
- Confirm that you have deposited or provided access to graph files (e.g. BED files) for the called peaks.

|                                                                               |                                                                                                                                                                                                                                                                                 |
|-------------------------------------------------------------------------------|---------------------------------------------------------------------------------------------------------------------------------------------------------------------------------------------------------------------------------------------------------------------------------|
| Data access links<br><i>May remain private before publication.</i>            | Raw data is available on the Sequence Read Archive at PRJNA595459. Analysis scripts are available at <a href="https://github.com/jbkinney/17_ars">https://github.com/jbkinney/17_ars</a> . No peak calling was performed in this study, so there are no graph files to provide. |
| Files in database submission                                                  | All files at PRJNA595459. and <a href="https://github.com/jbkinney/17_ars">https://github.com/jbkinney/17_ars</a> .                                                                                                                                                             |
| Genome browser session<br>(e.g. <a href="https://genome.ucsc.edu/">UCSC</a> ) | N/A                                                                                                                                                                                                                                                                             |

## Methodology

|                         |                                                                                                                                                                                                                                        |
|-------------------------|----------------------------------------------------------------------------------------------------------------------------------------------------------------------------------------------------------------------------------------|
| Replicates              | See text.                                                                                                                                                                                                                              |
| Sequencing depth        | See text.                                                                                                                                                                                                                              |
| Antibodies              | See text.                                                                                                                                                                                                                              |
| Peak calling parameters | N/A                                                                                                                                                                                                                                    |
| Data quality            | N/A                                                                                                                                                                                                                                    |
| Software                | BAM and SAMtools were used to do read mapping. No peak calling was performed. All CHIP-seq analysis was performed using custom Python scripts at <a href="https://github.com/jbkinney/17_ars">https://github.com/jbkinney/17_ars</a> . |

## Flow Cytometry

### Plots

Confirm that:

- The axis labels state the marker and fluorochrome used (e.g. CD4-FITC).
- The axis scales are clearly visible. Include numbers along axes only for bottom left plot of group (a 'group' is an analysis of identical markers).
- All plots are contour plots with outliers or pseudocolor plots.
- A numerical value for number of cells or percentage (with statistics) is provided.

## Methodology

|                           |                                                                                                                                                                                                                                                                                         |
|---------------------------|-----------------------------------------------------------------------------------------------------------------------------------------------------------------------------------------------------------------------------------------------------------------------------------------|
| Sample preparation        | The <u>above</u> parameters are not relevant to the type of flow cytometry we used. We did not sort and did not perform two stain flow sorts. Flow cytometry was used to determine the cell cycle distribution only and DNA was stained with SYBR green as stated in the figure legend. |
| Instrument                | BD LSRFortessa Dual Special Order System instrument                                                                                                                                                                                                                                     |
| Software                  | BD FACSDiva Software Version 8.0.1 Firmware Version 1.4 (BD LSRFortessa)                                                                                                                                                                                                                |
| Cell population abundance | not applicable                                                                                                                                                                                                                                                                          |
| Gating strategy           | FlowJo Version 10.6.1 was used to analyze the data and no gating strategy used.                                                                                                                                                                                                         |

- Tick this box to confirm that a figure exemplifying the gating strategy is provided in the Supplementary Information.
