# Supplementary material for: Evolution of DNA replication origin specification and gene silencing mechanisms
Source: PubMed Central journal article supplement (PMC7560902; doi:10.1038/s41467-020-18964-x), 2020-10-14

Supplementary Fig. 4 anti-Orc4 (short exposure)

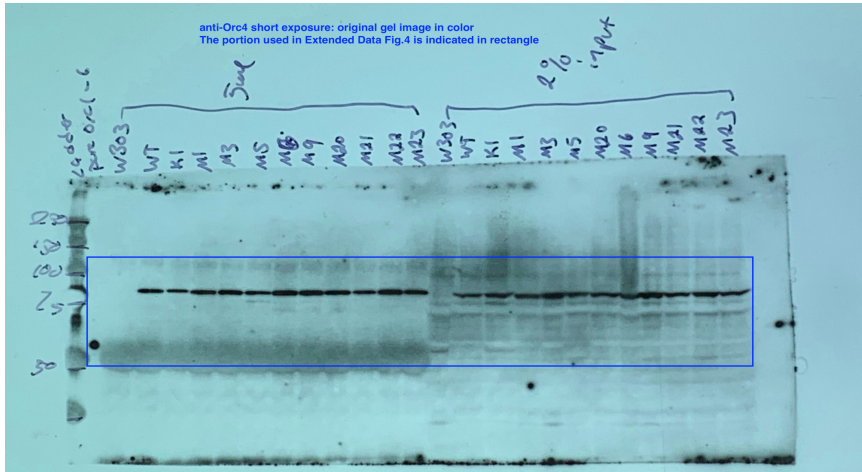

anti-Orc4 (long exposure)

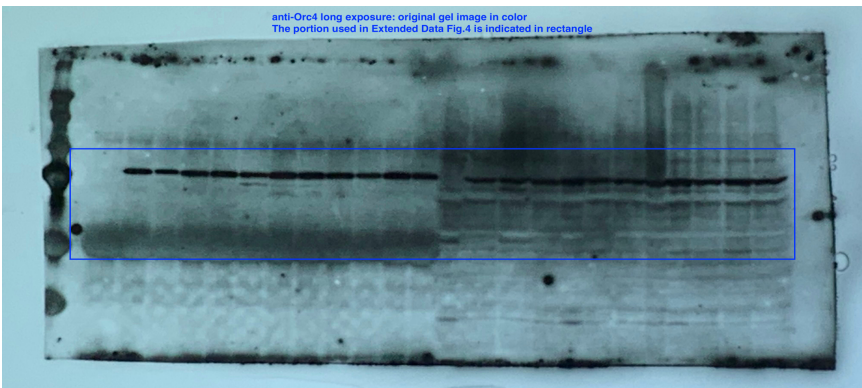

anti-Orc1 (short exposure)

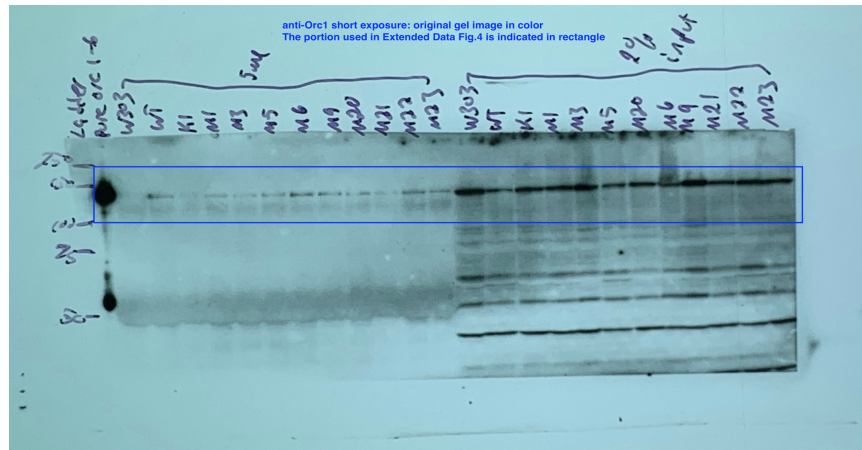

anti-Orc1 (long exposure)

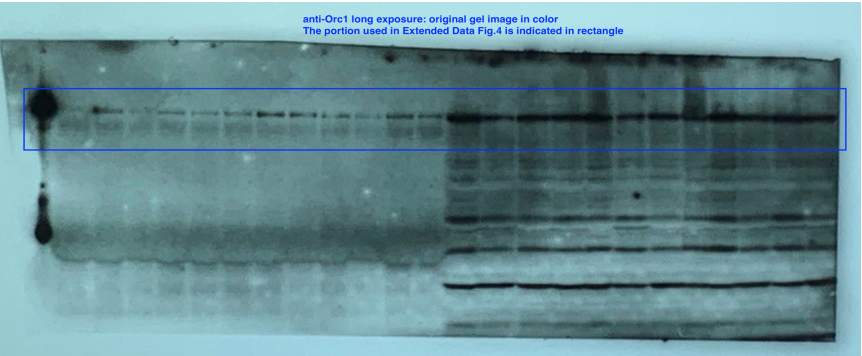

Supplement: 41467_2020_18964_MOESM6_ESM.pdf [file 41467_2020_18964_MOESM6_ESM.pdf]
